# Supplementary material for: Towards a unified model of naive T cell dynamics across the lifespan
Source: eLife journal article supplement (doi:10.7554/elife.78168), 2022-06-09

CD4 - Density dependent loss

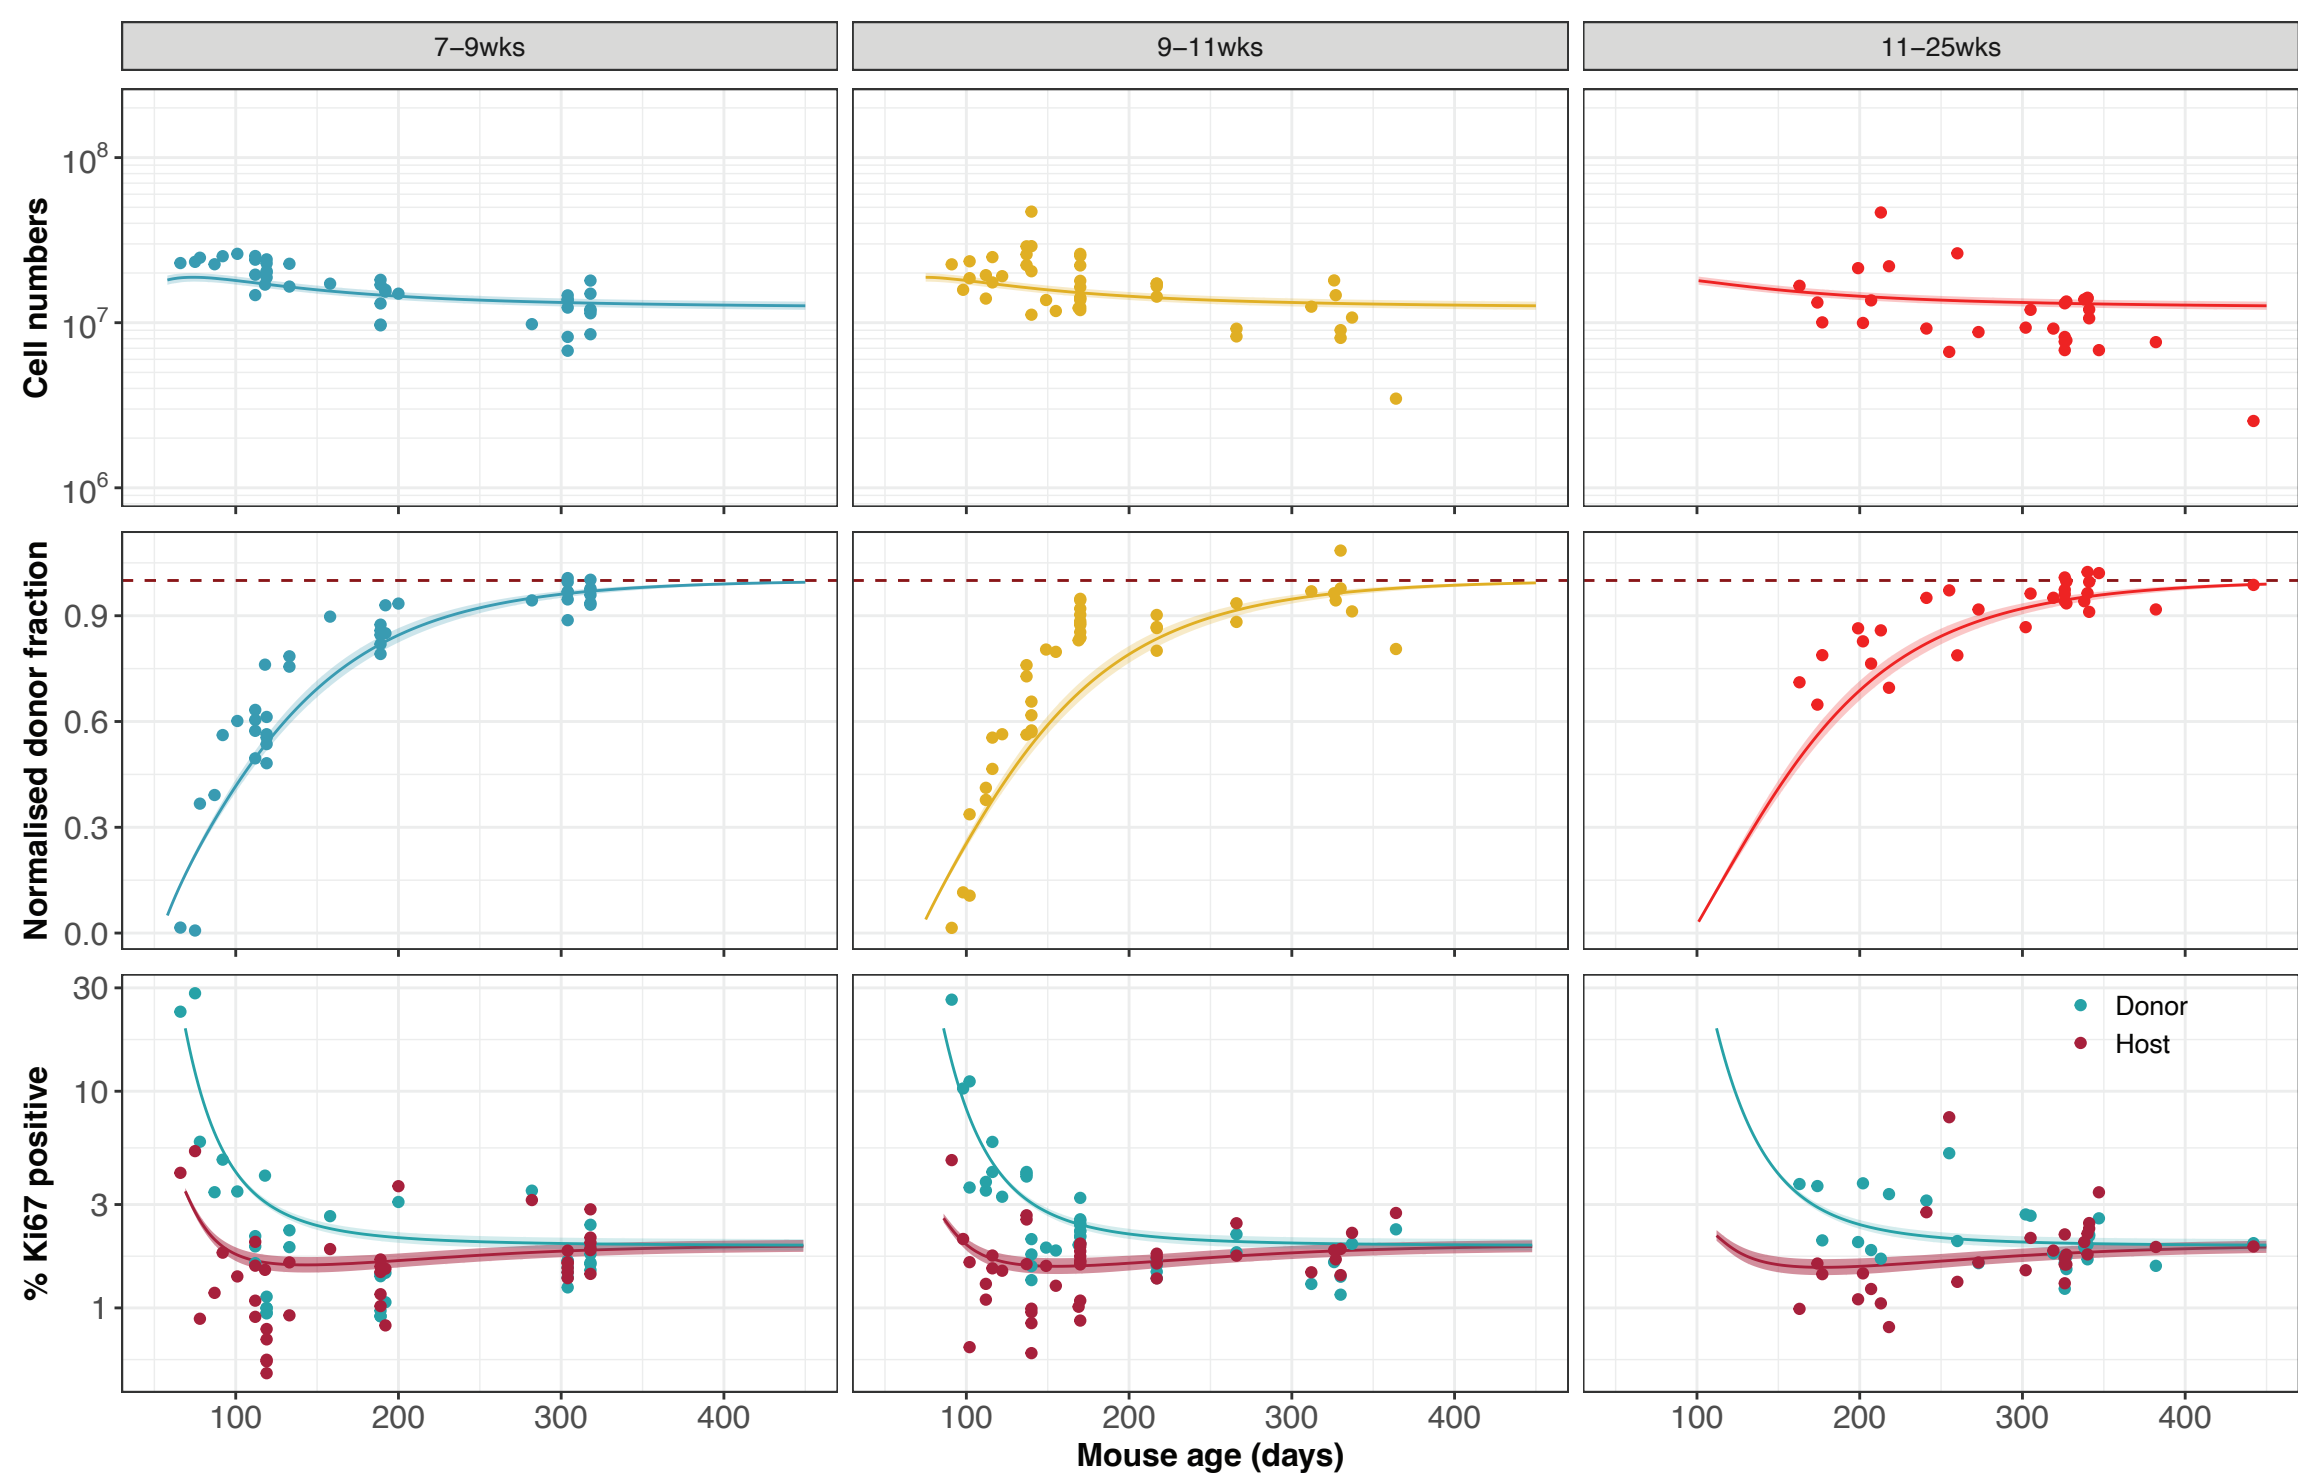

CD4 - Density-dependent division (LIP)

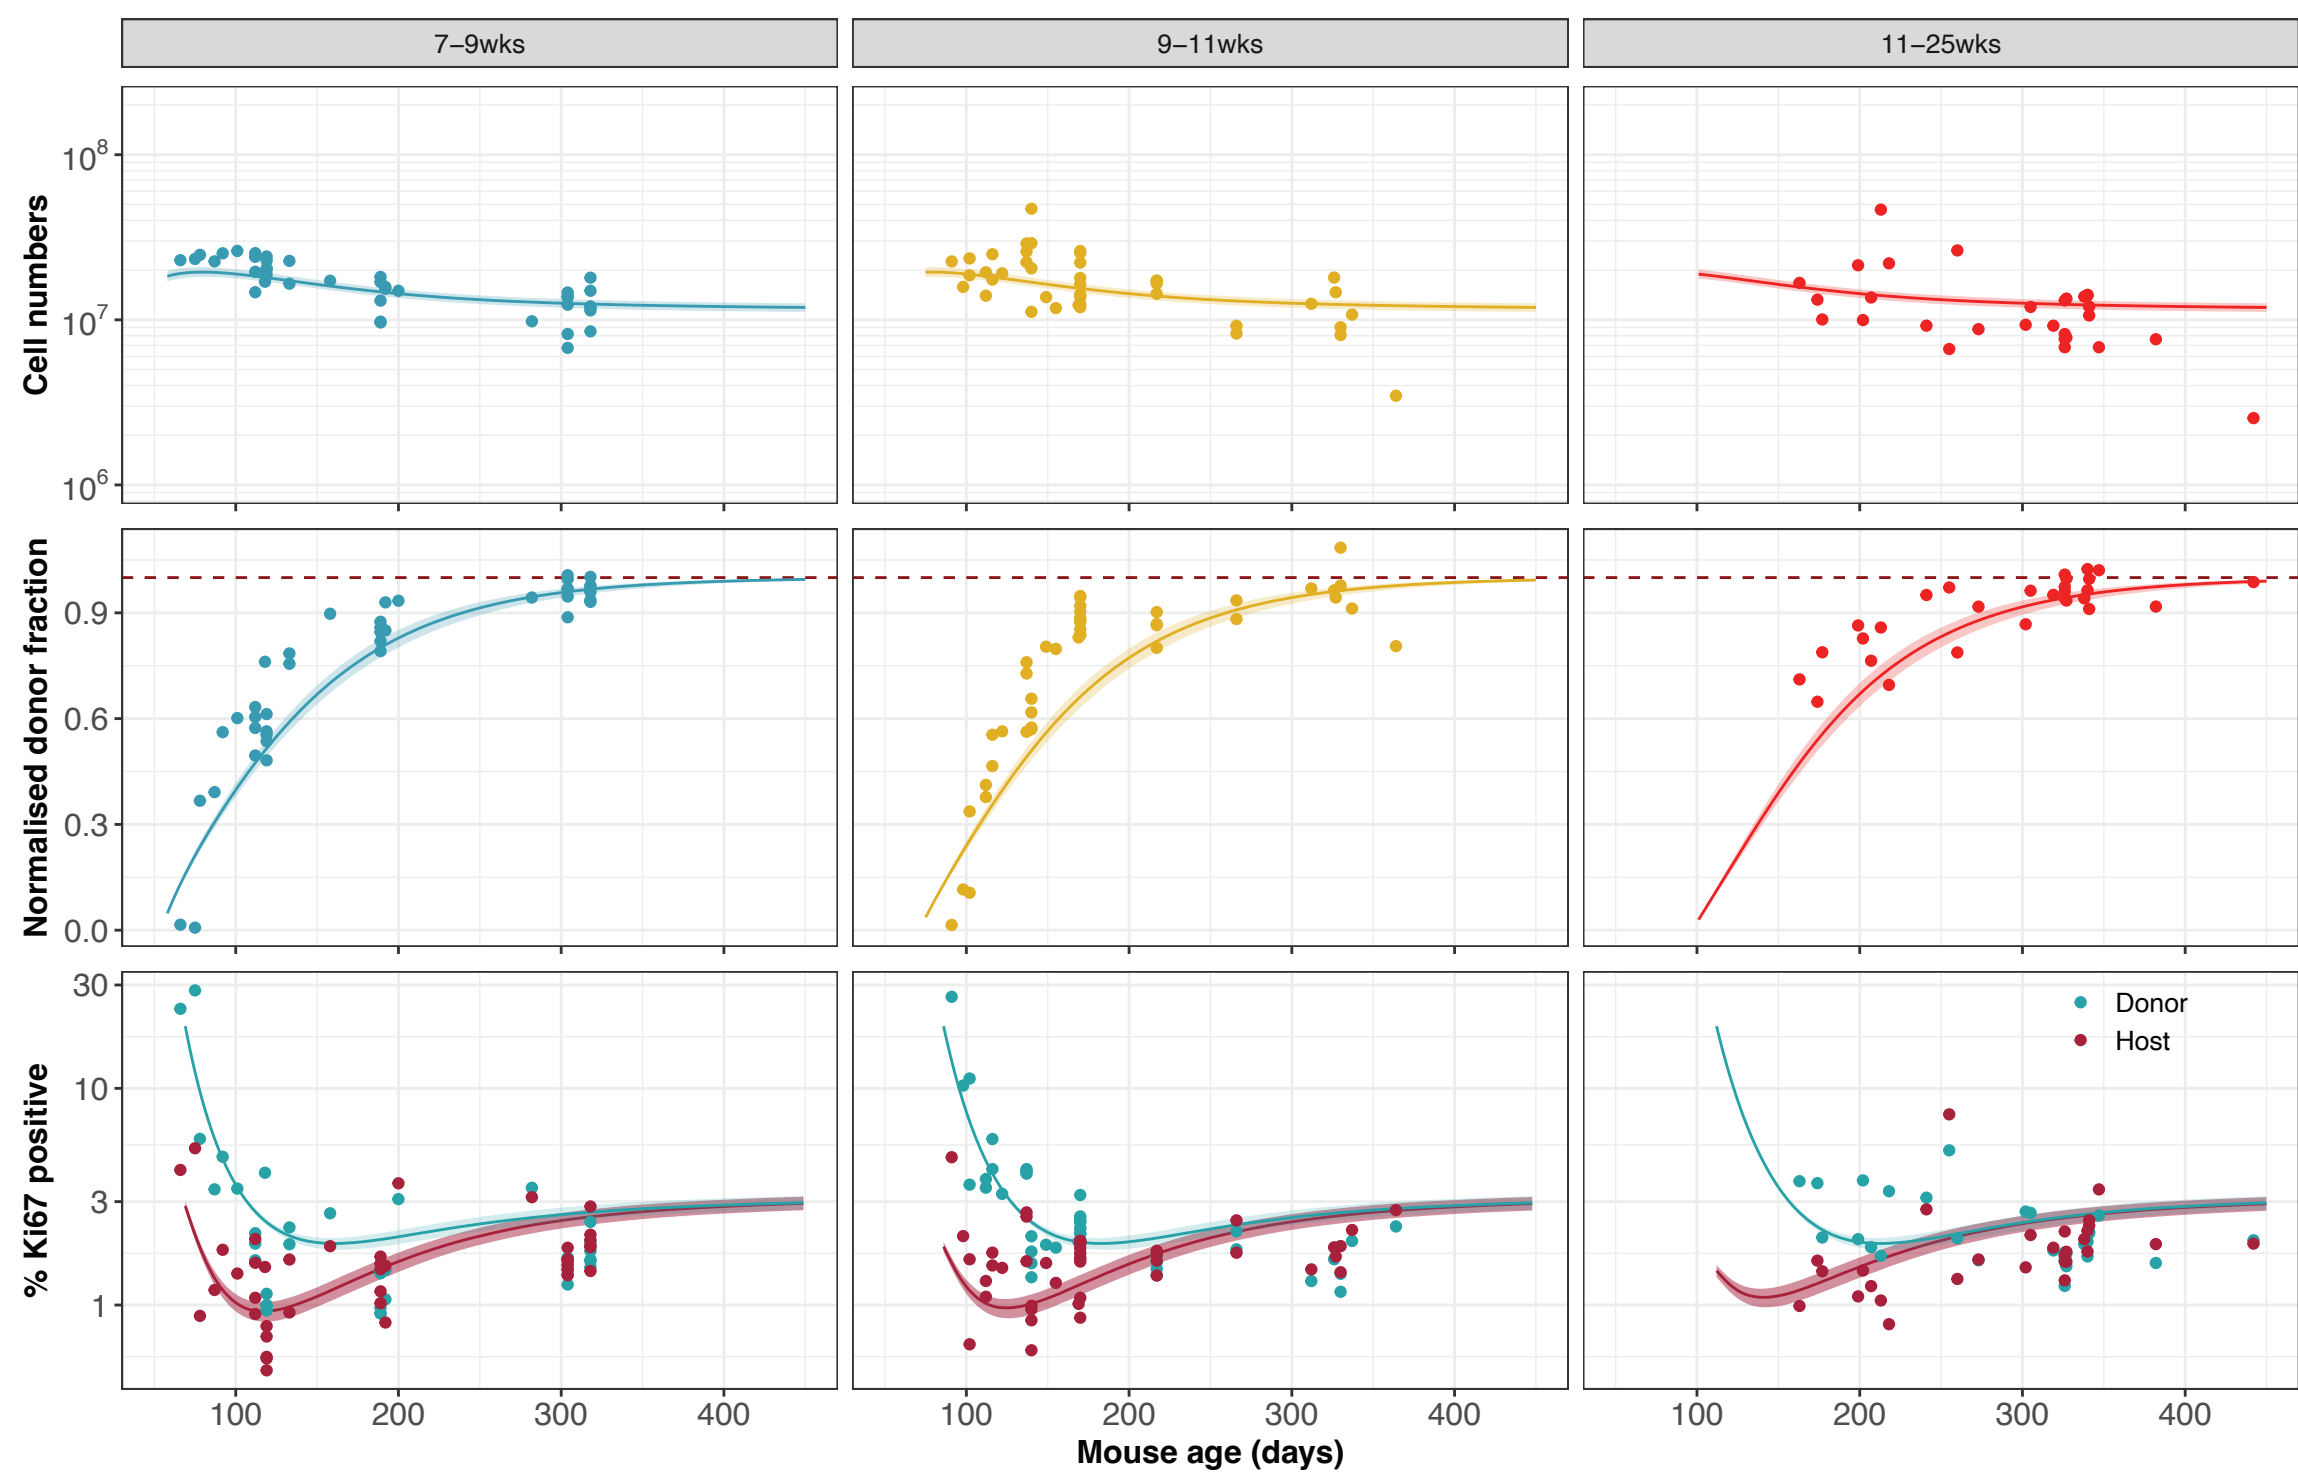

CD4 - Neutral model

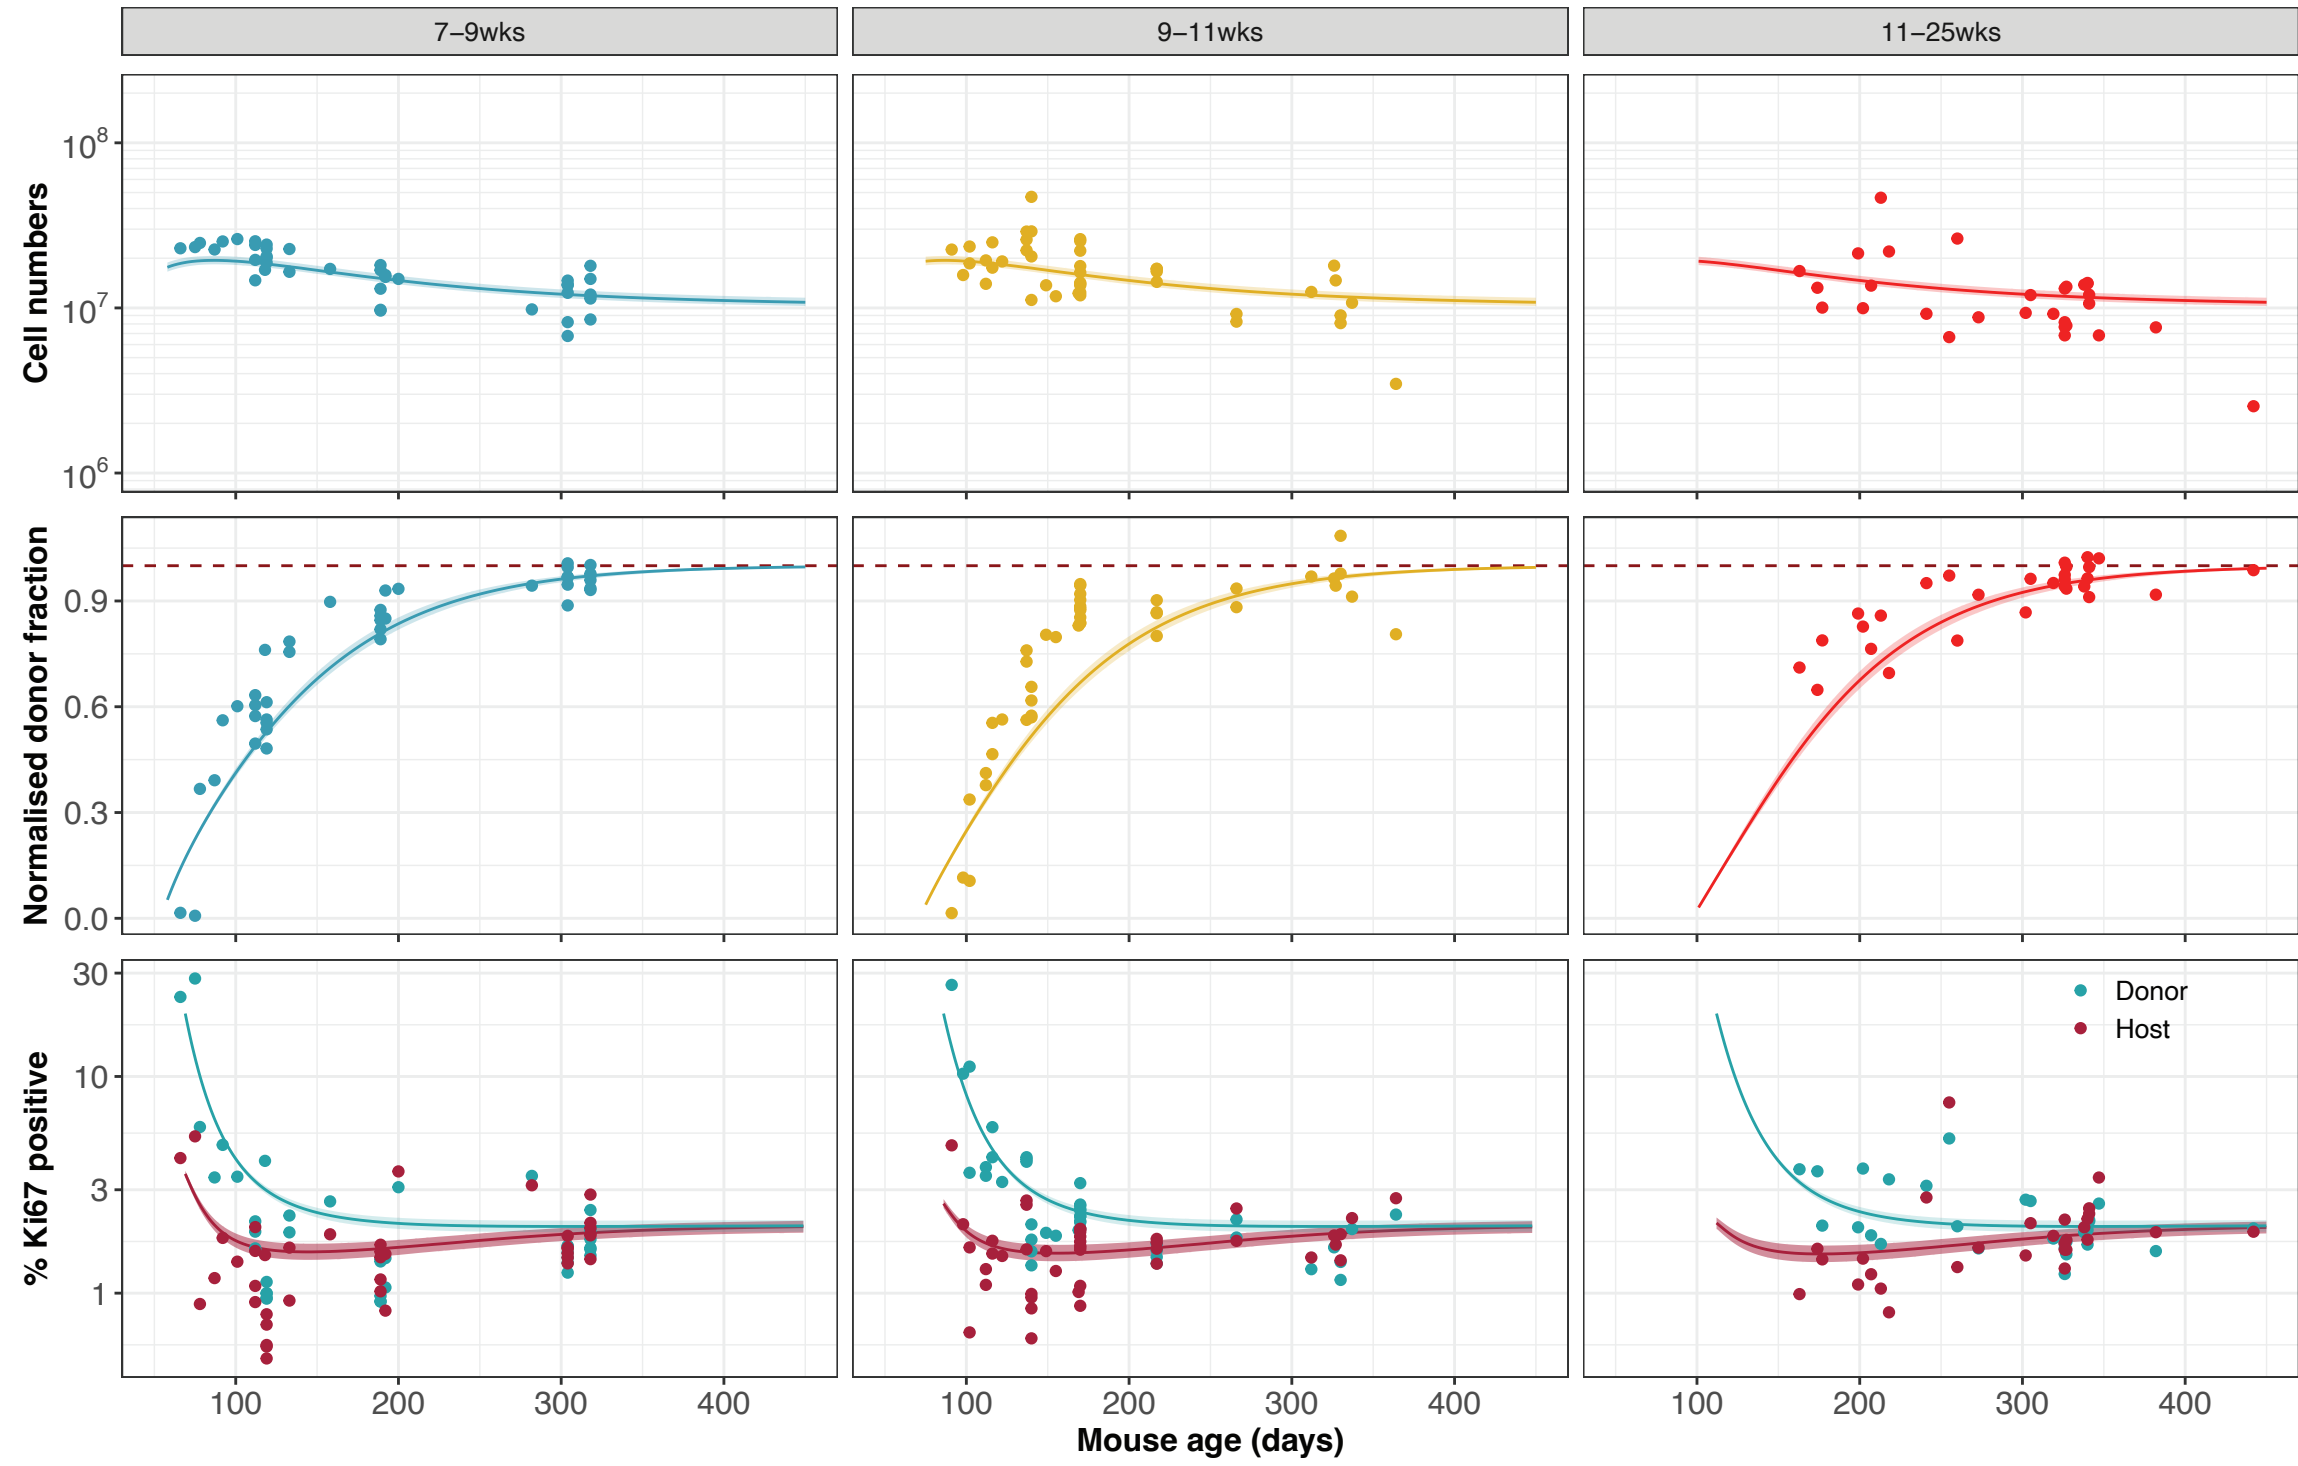

CD4 - RTE and mature naive model

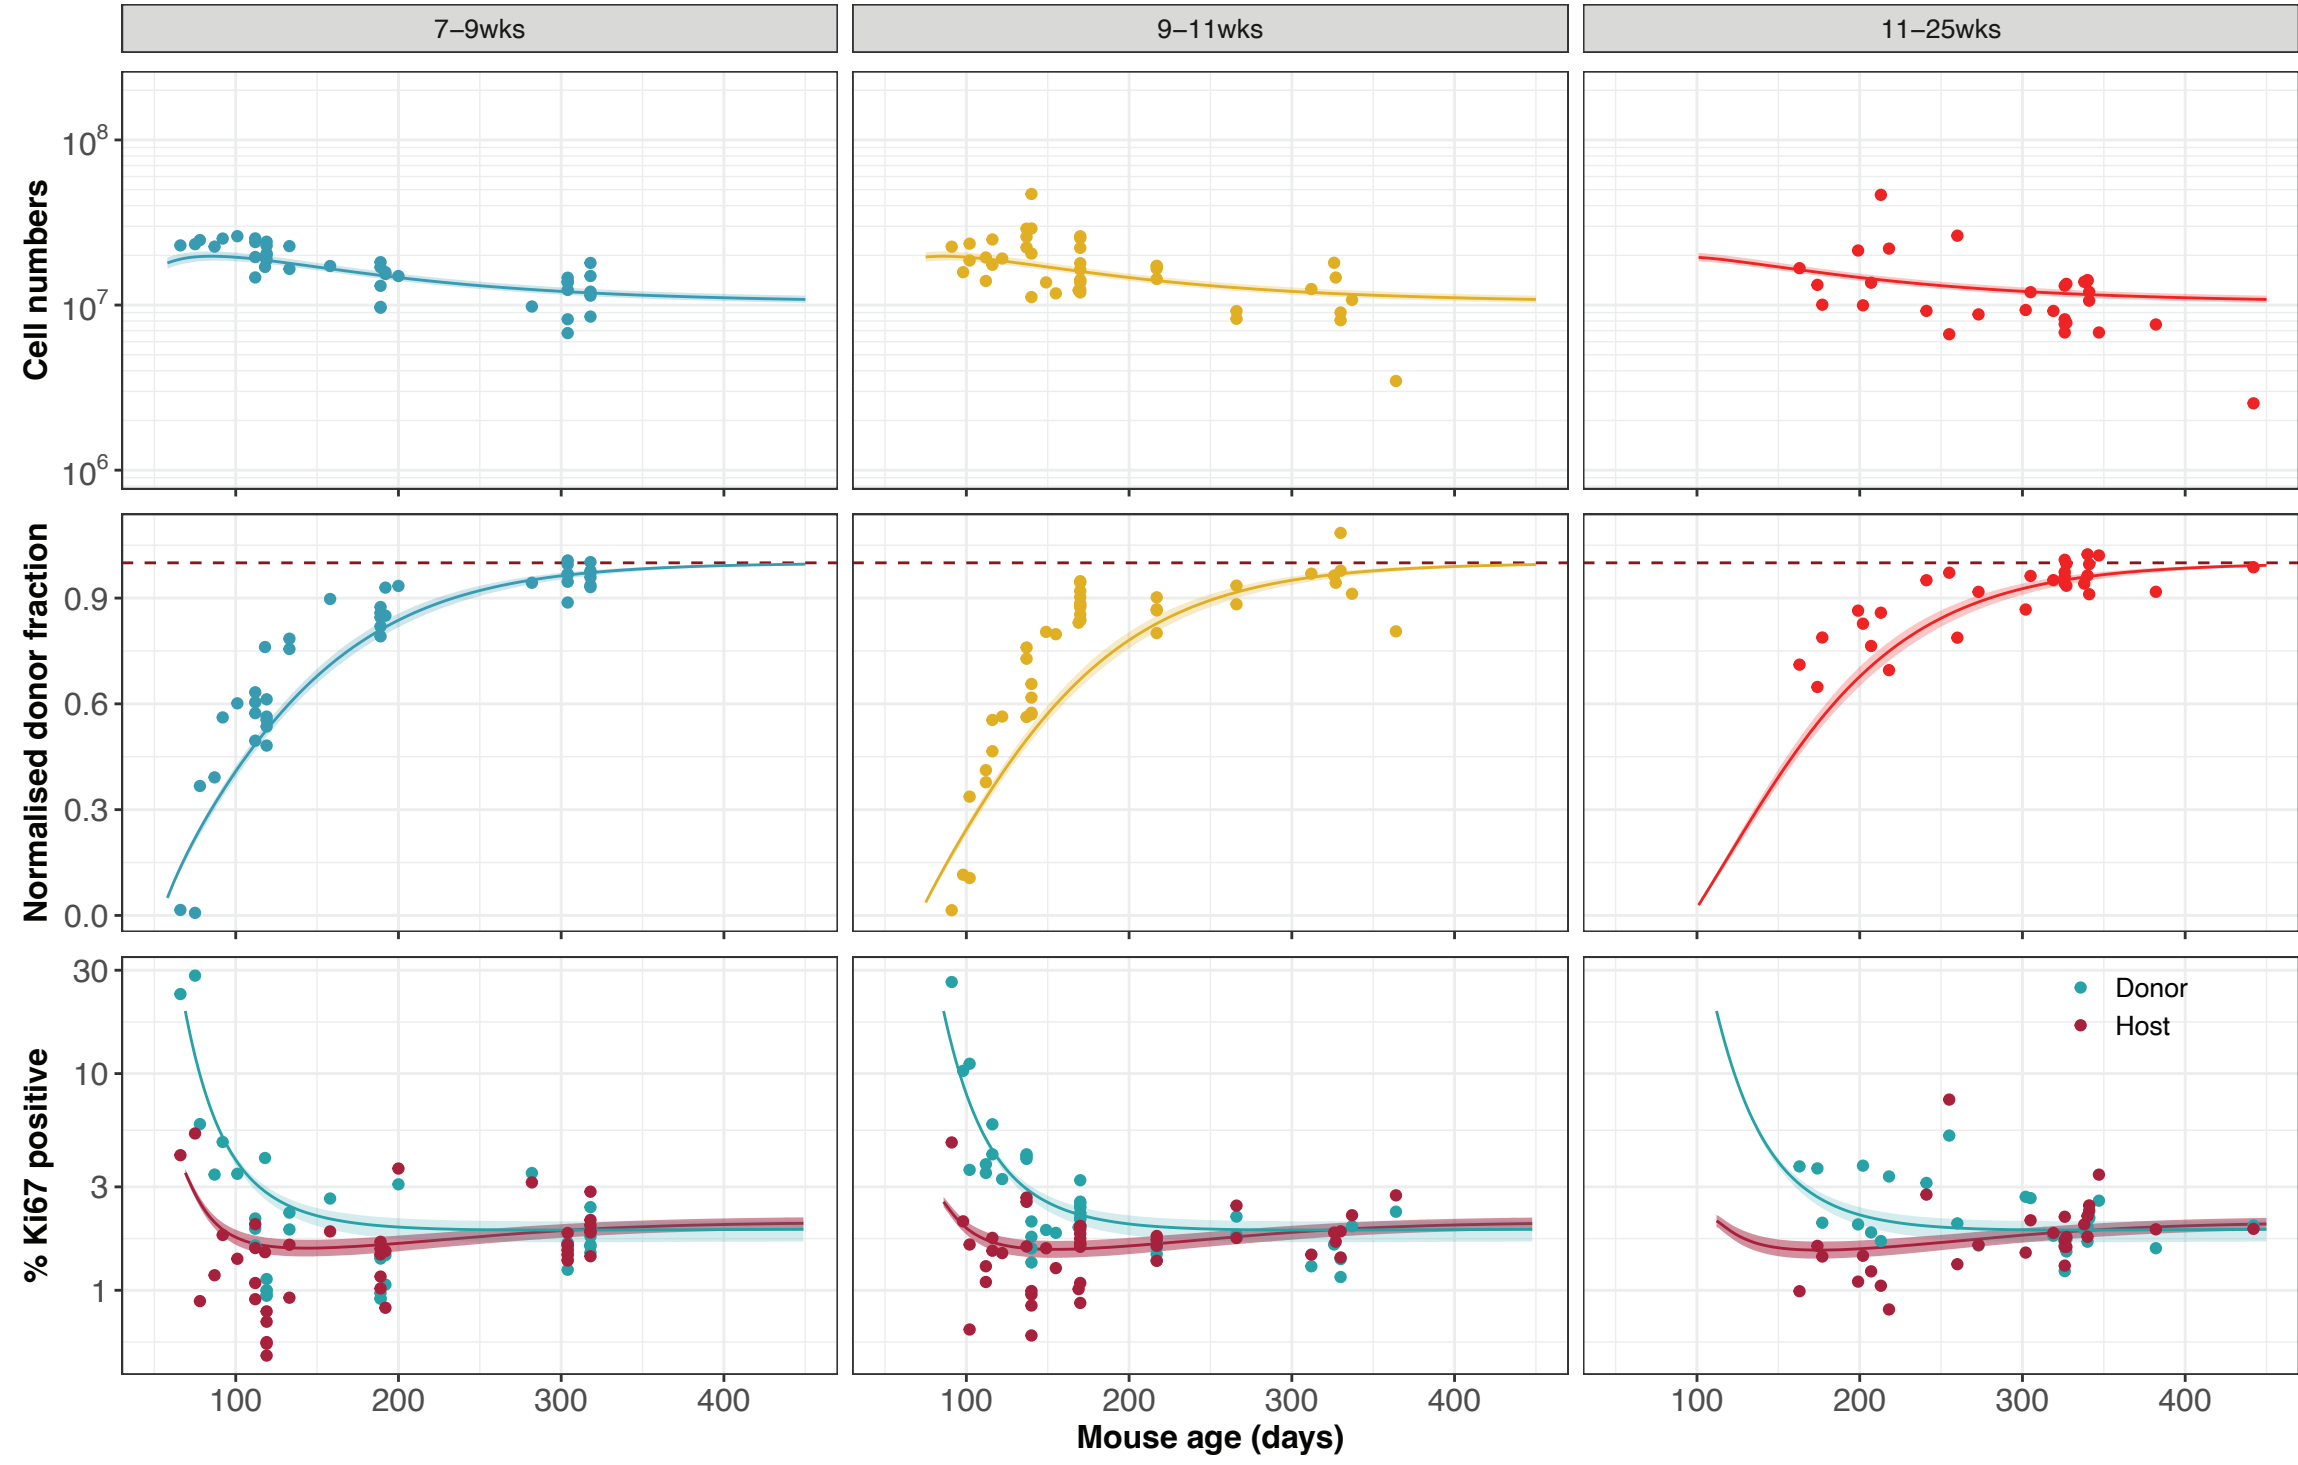

CD4 - Age-dependent division model

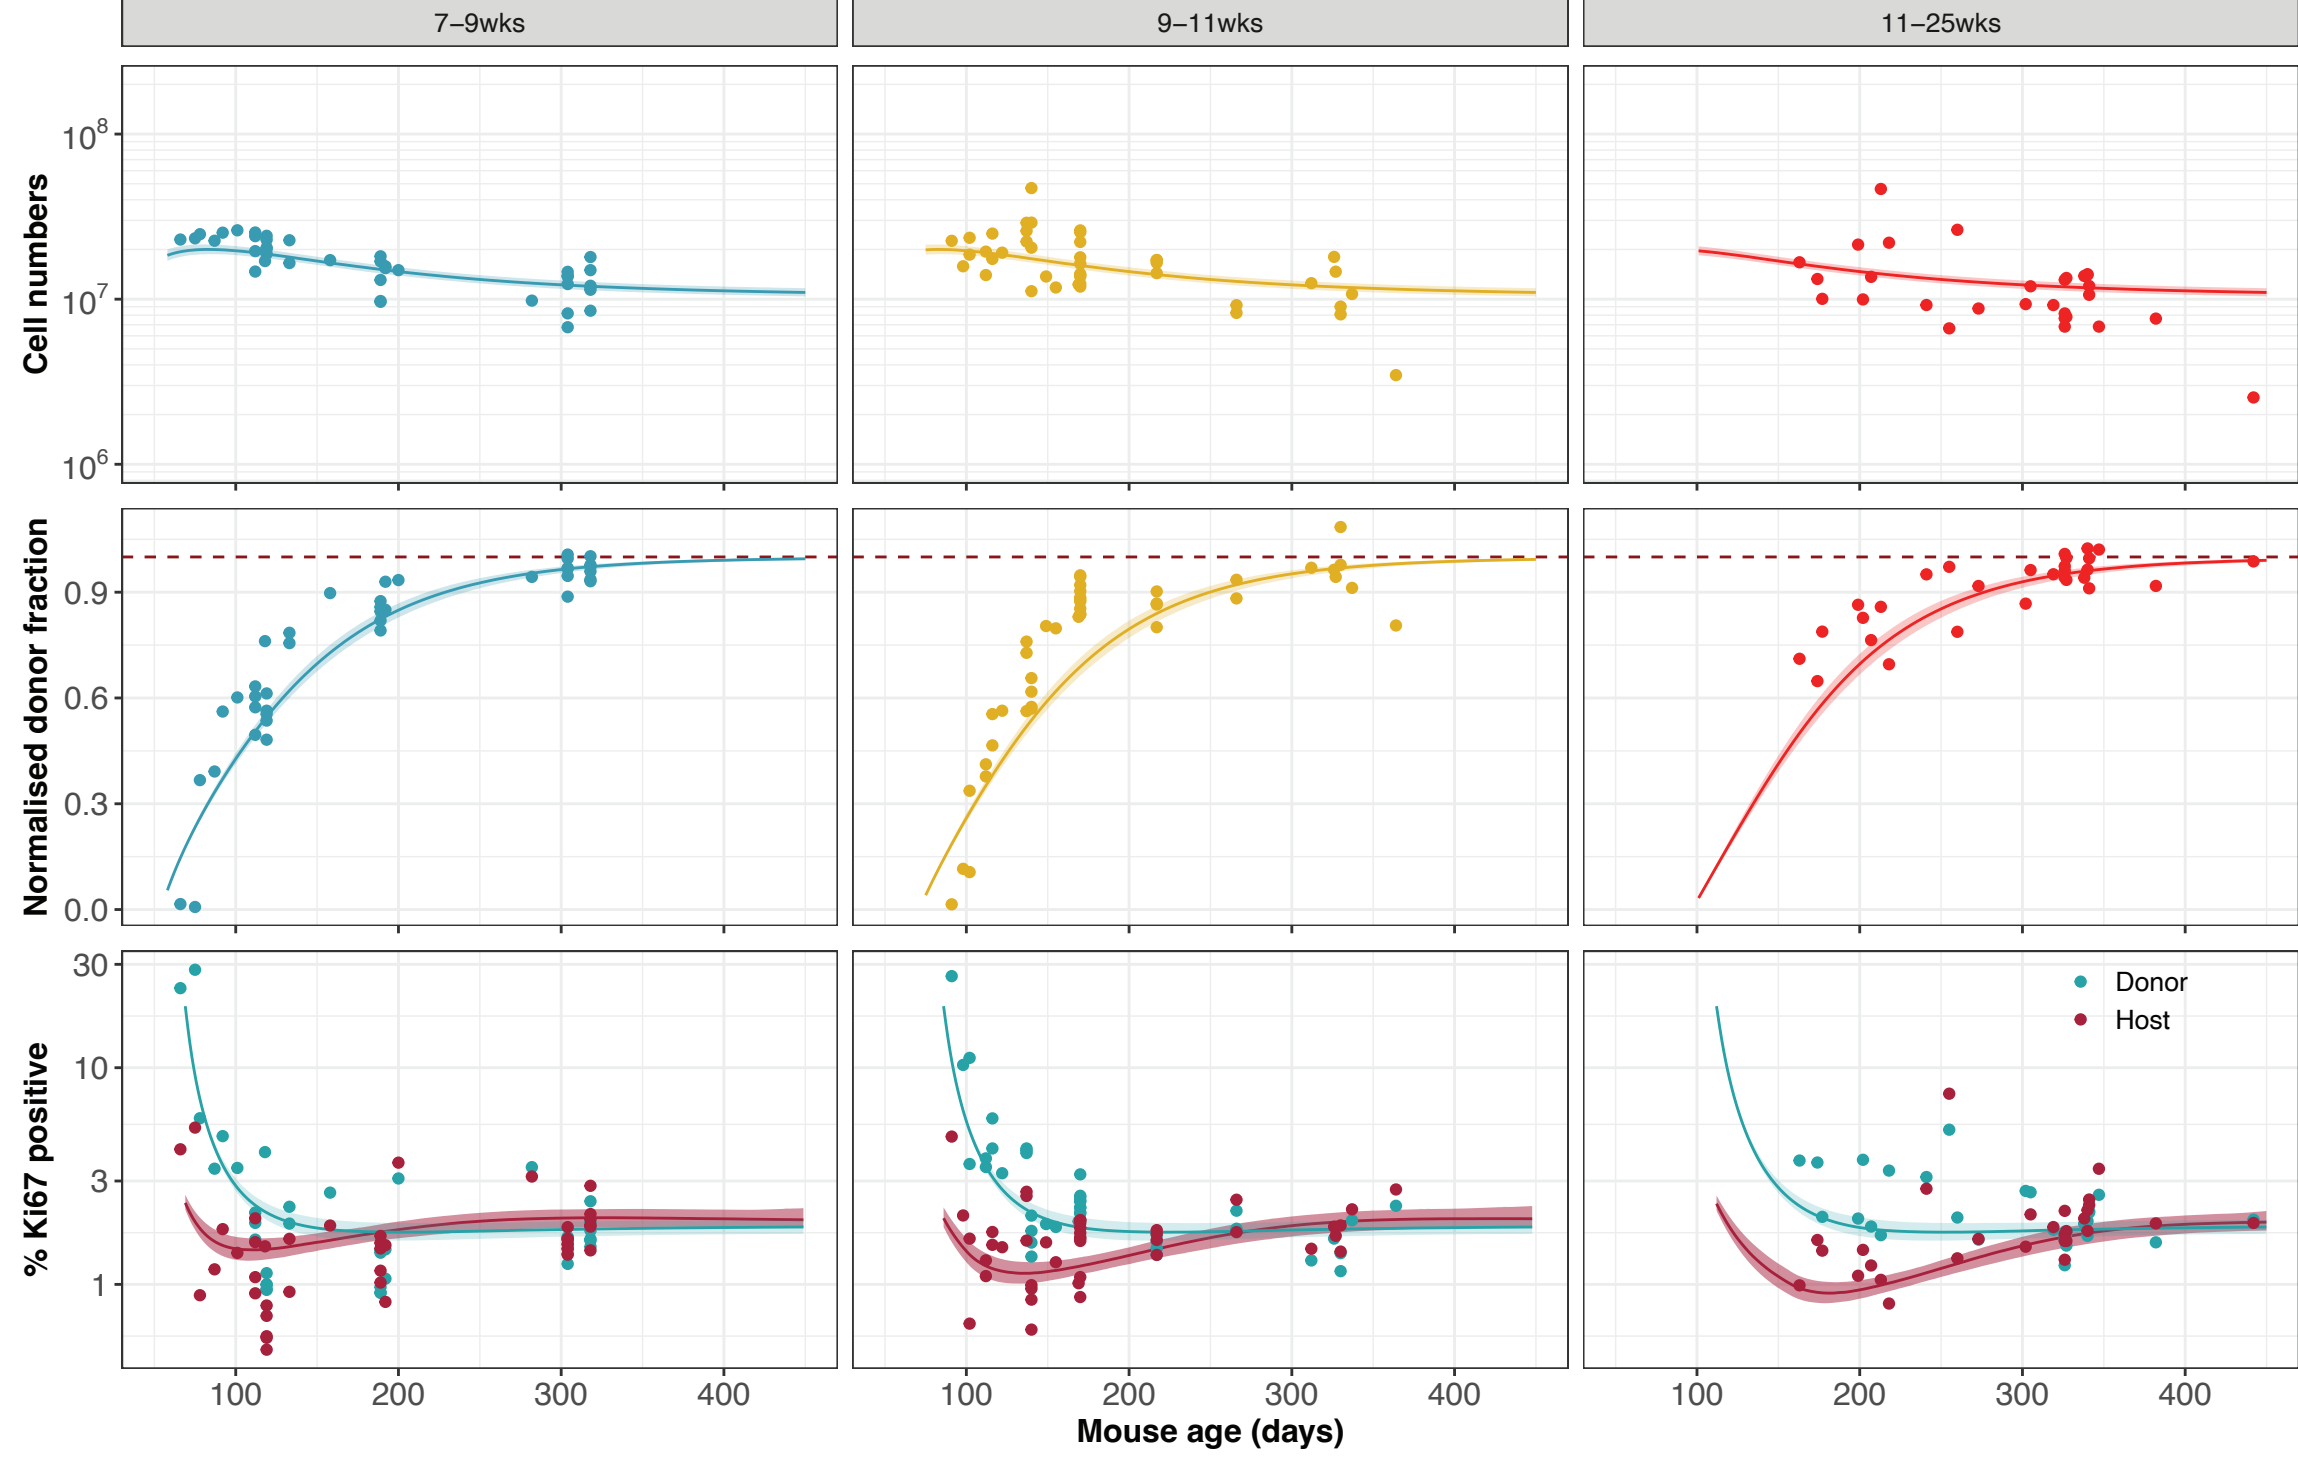

CD8 - Density dependent loss

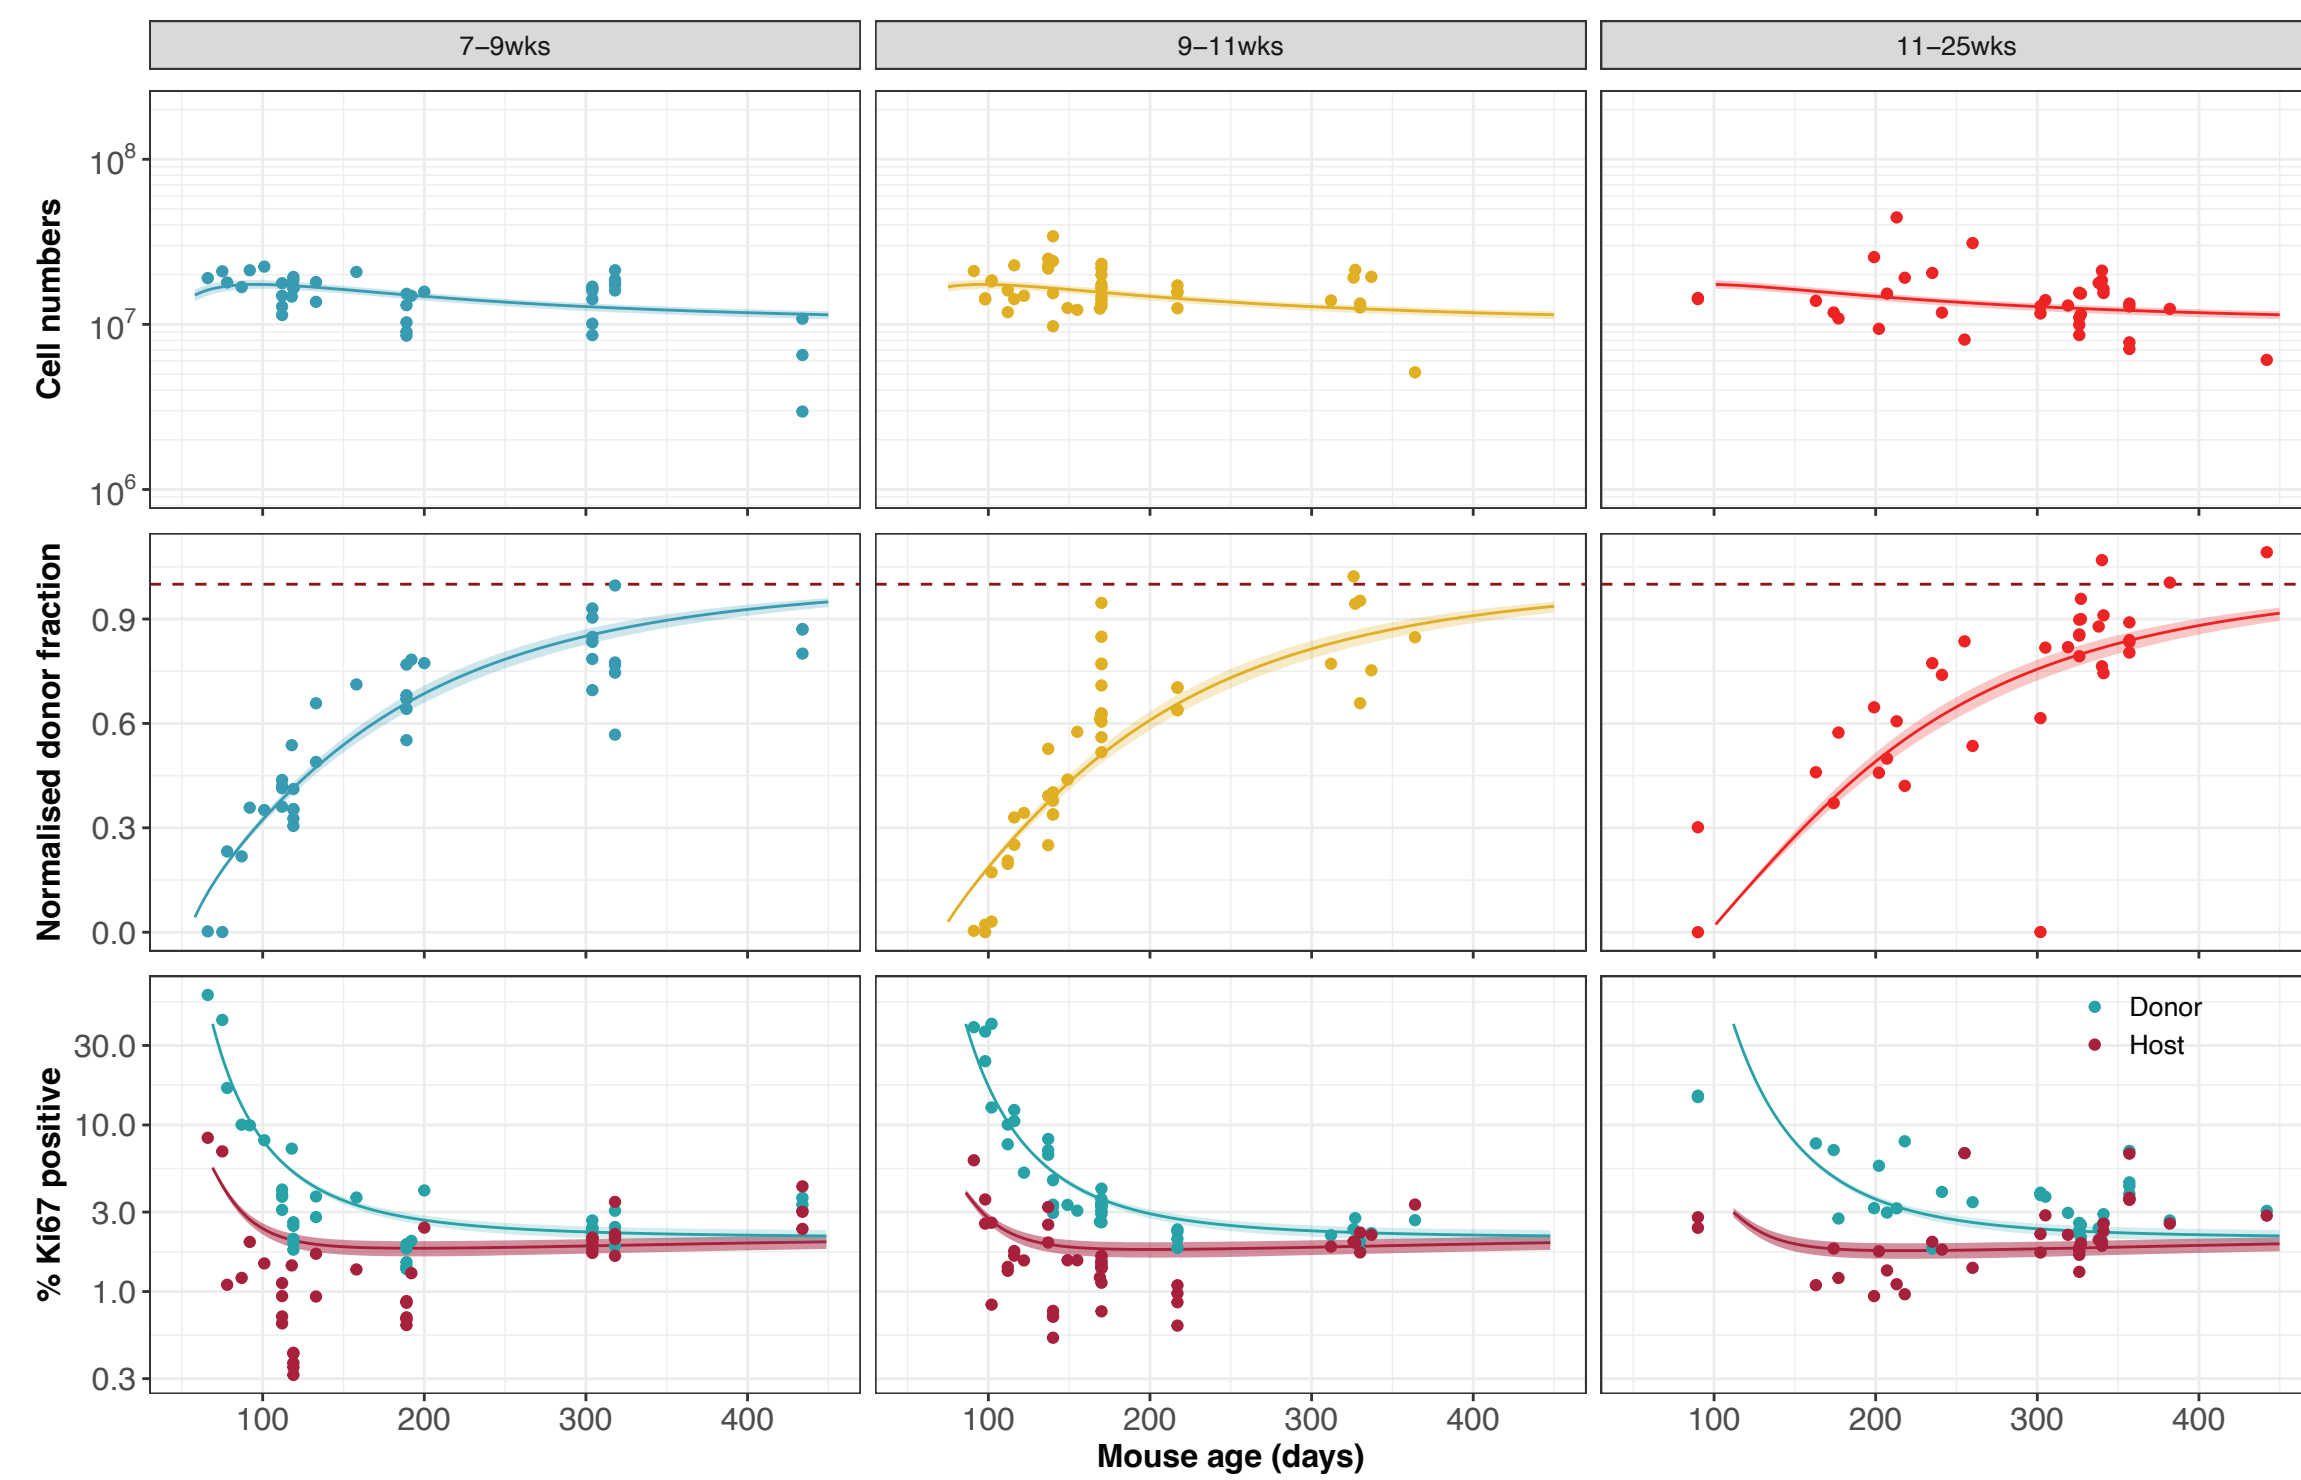

CD8 - Density-dependent division (LIP)

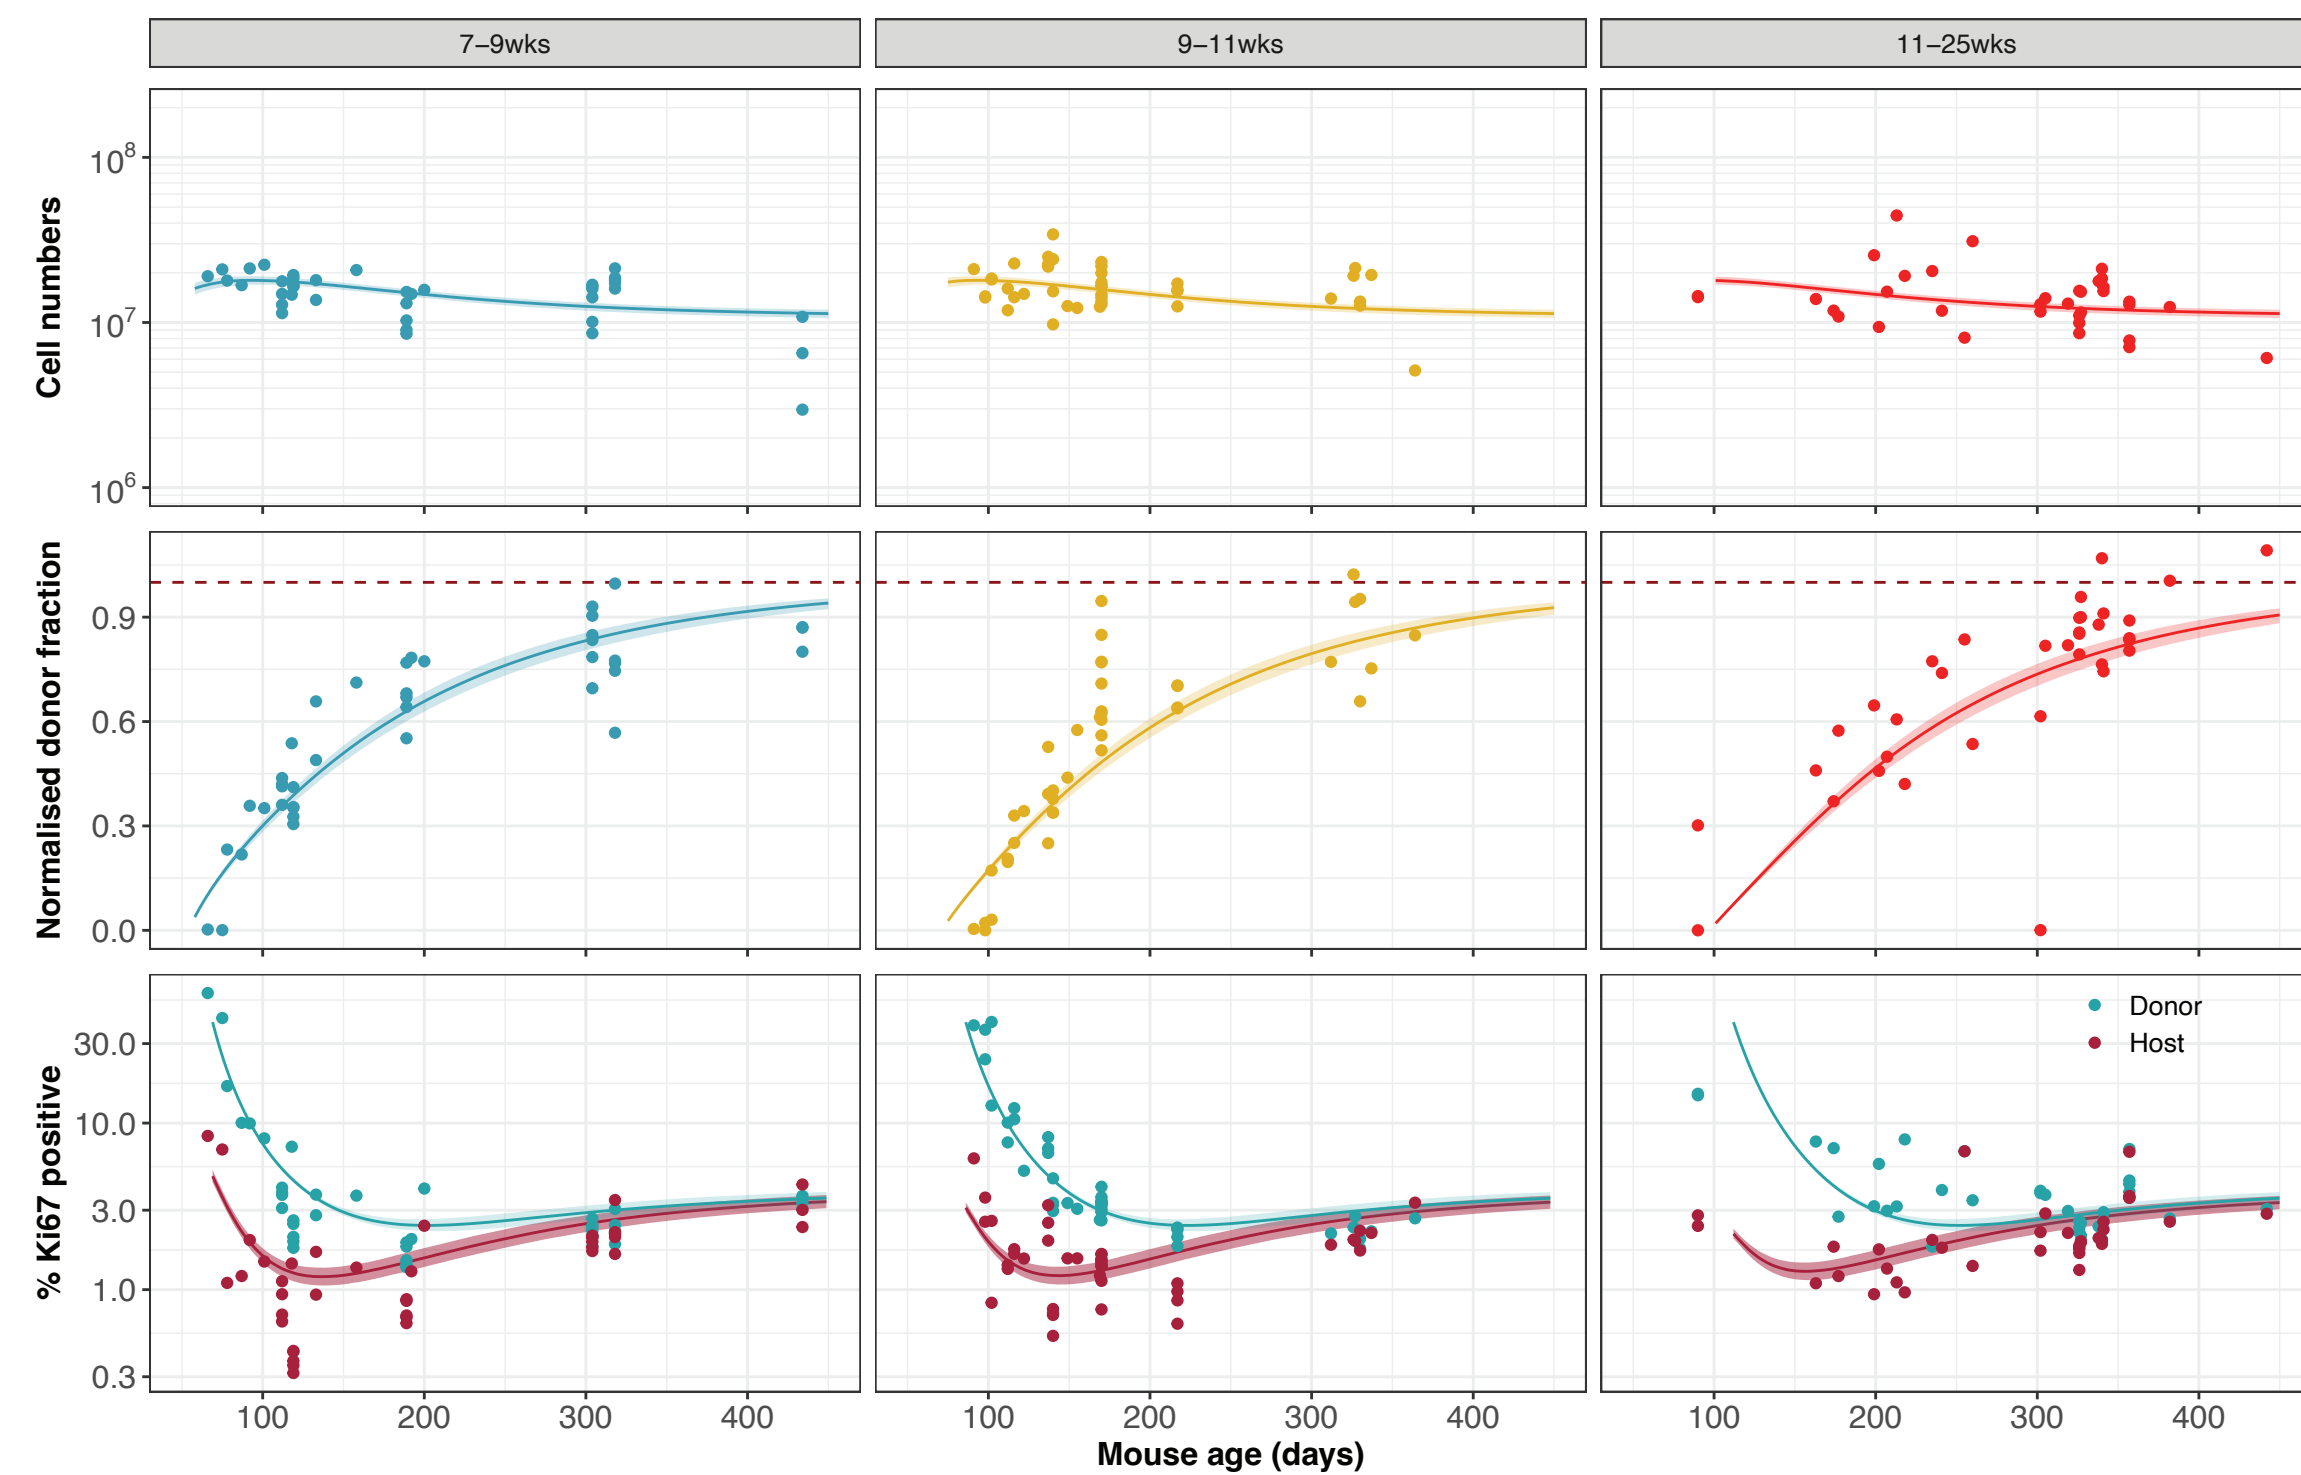

CD8 - Neutral model

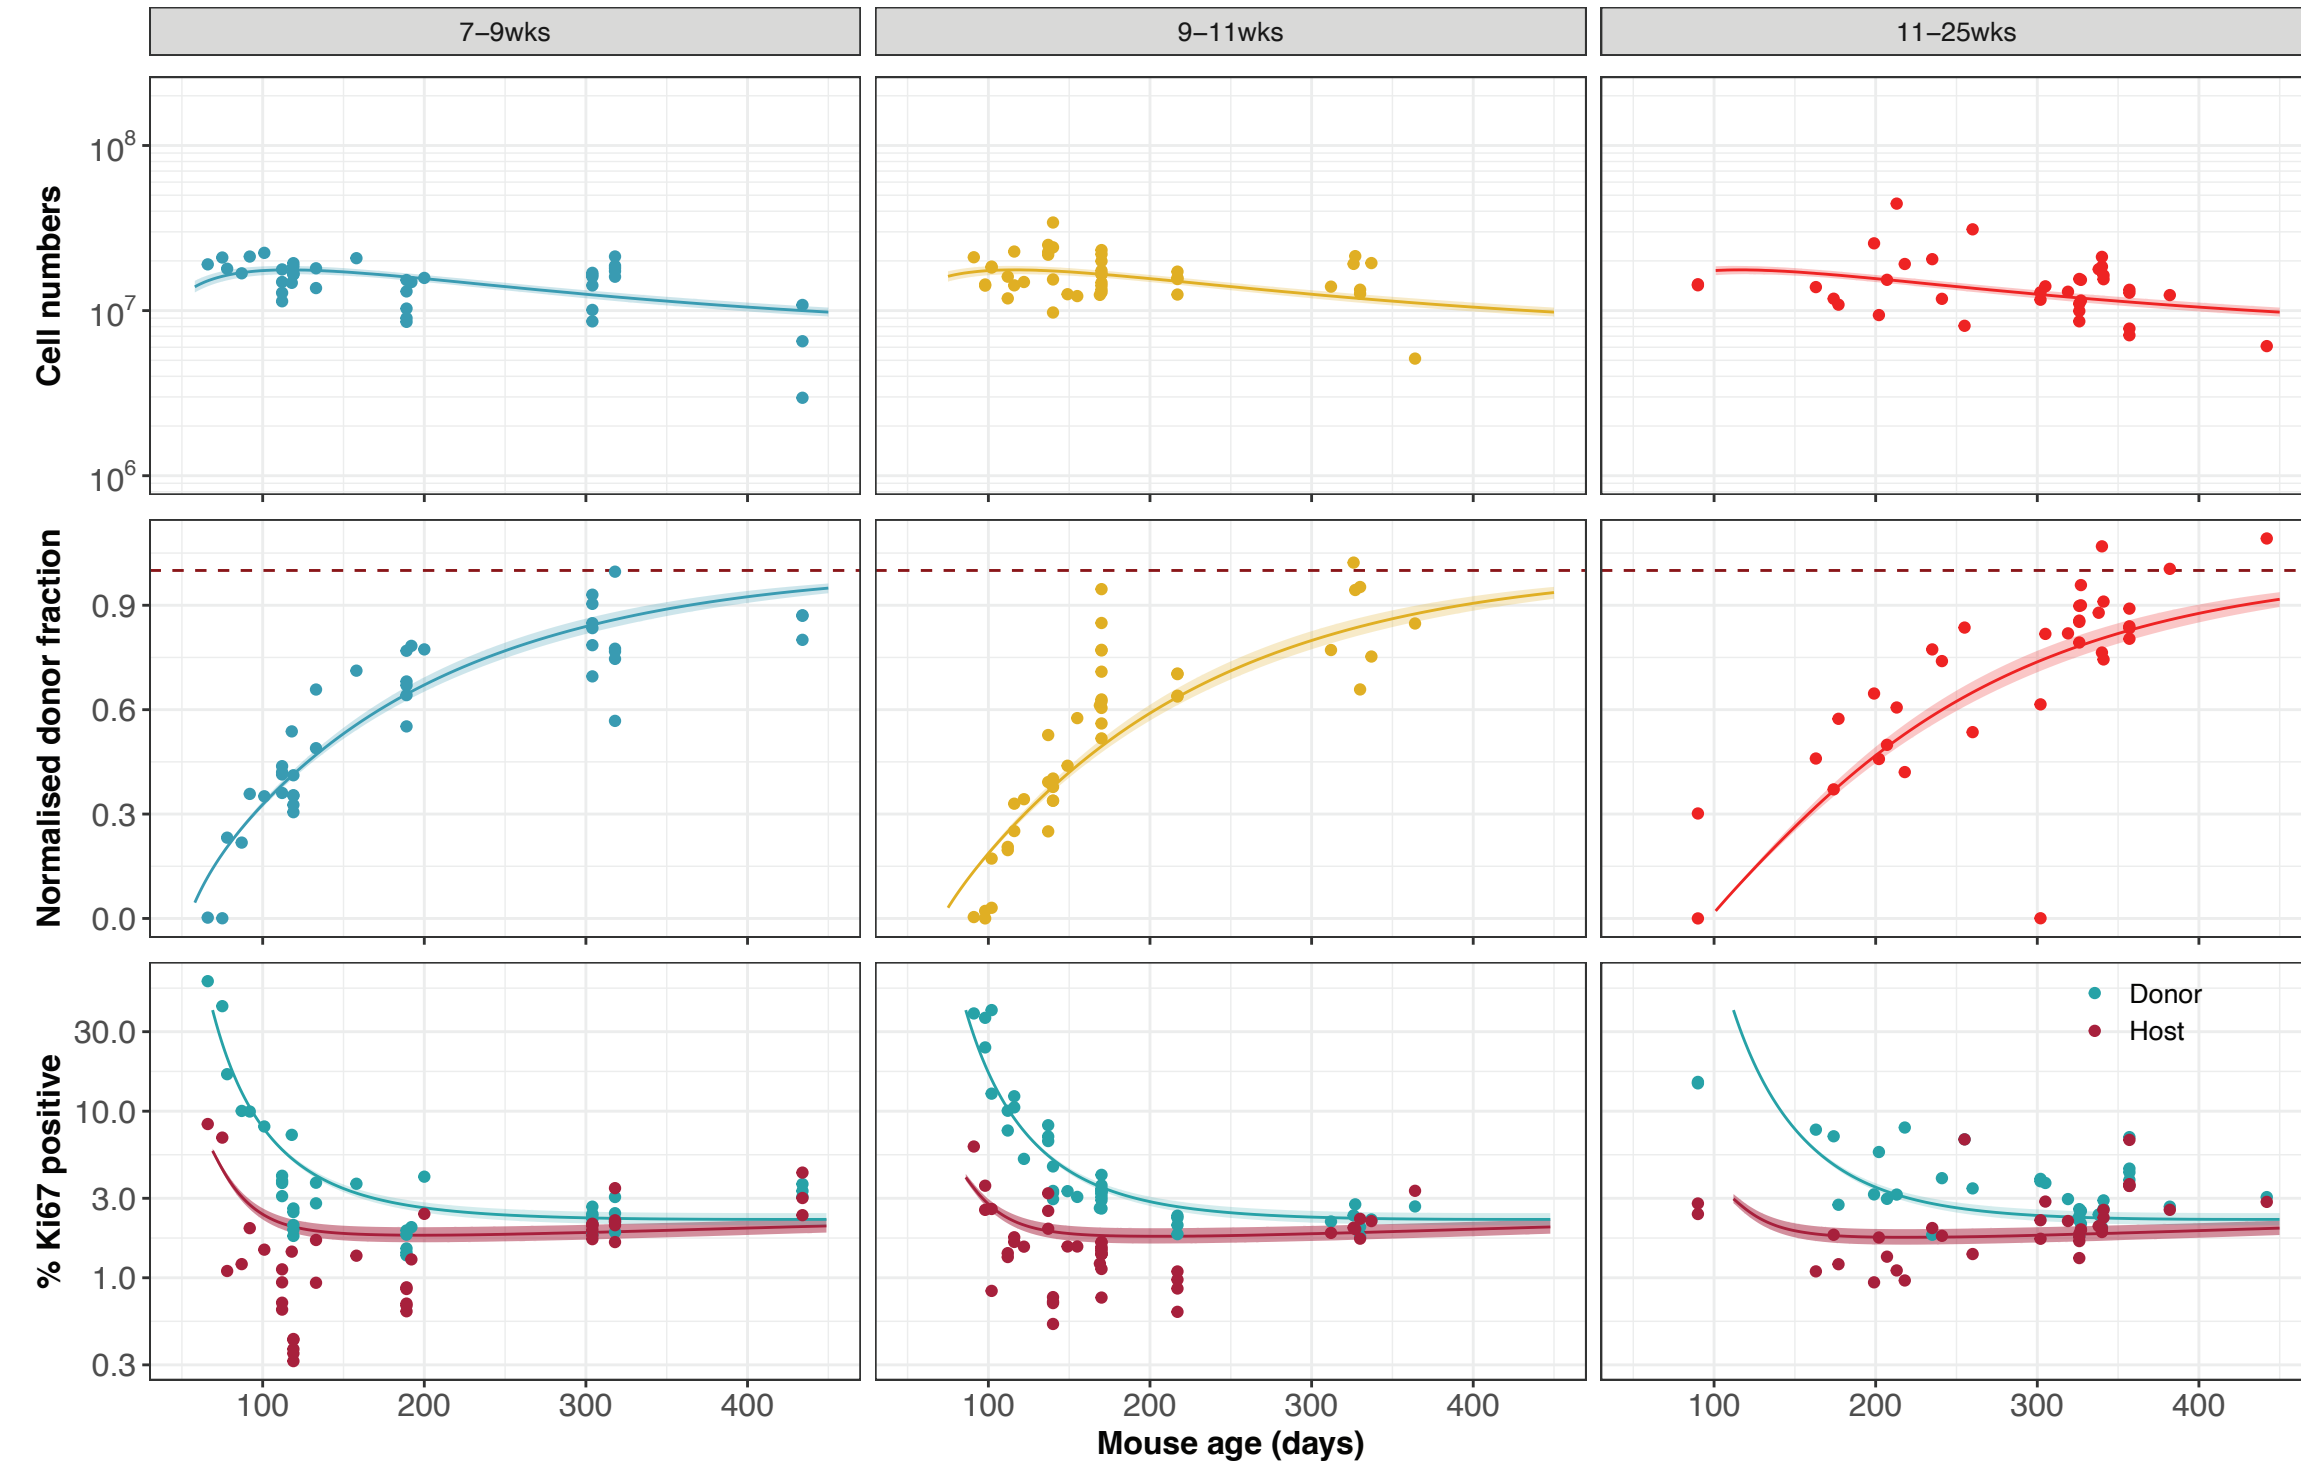

CD8 - RTE and mature naive model

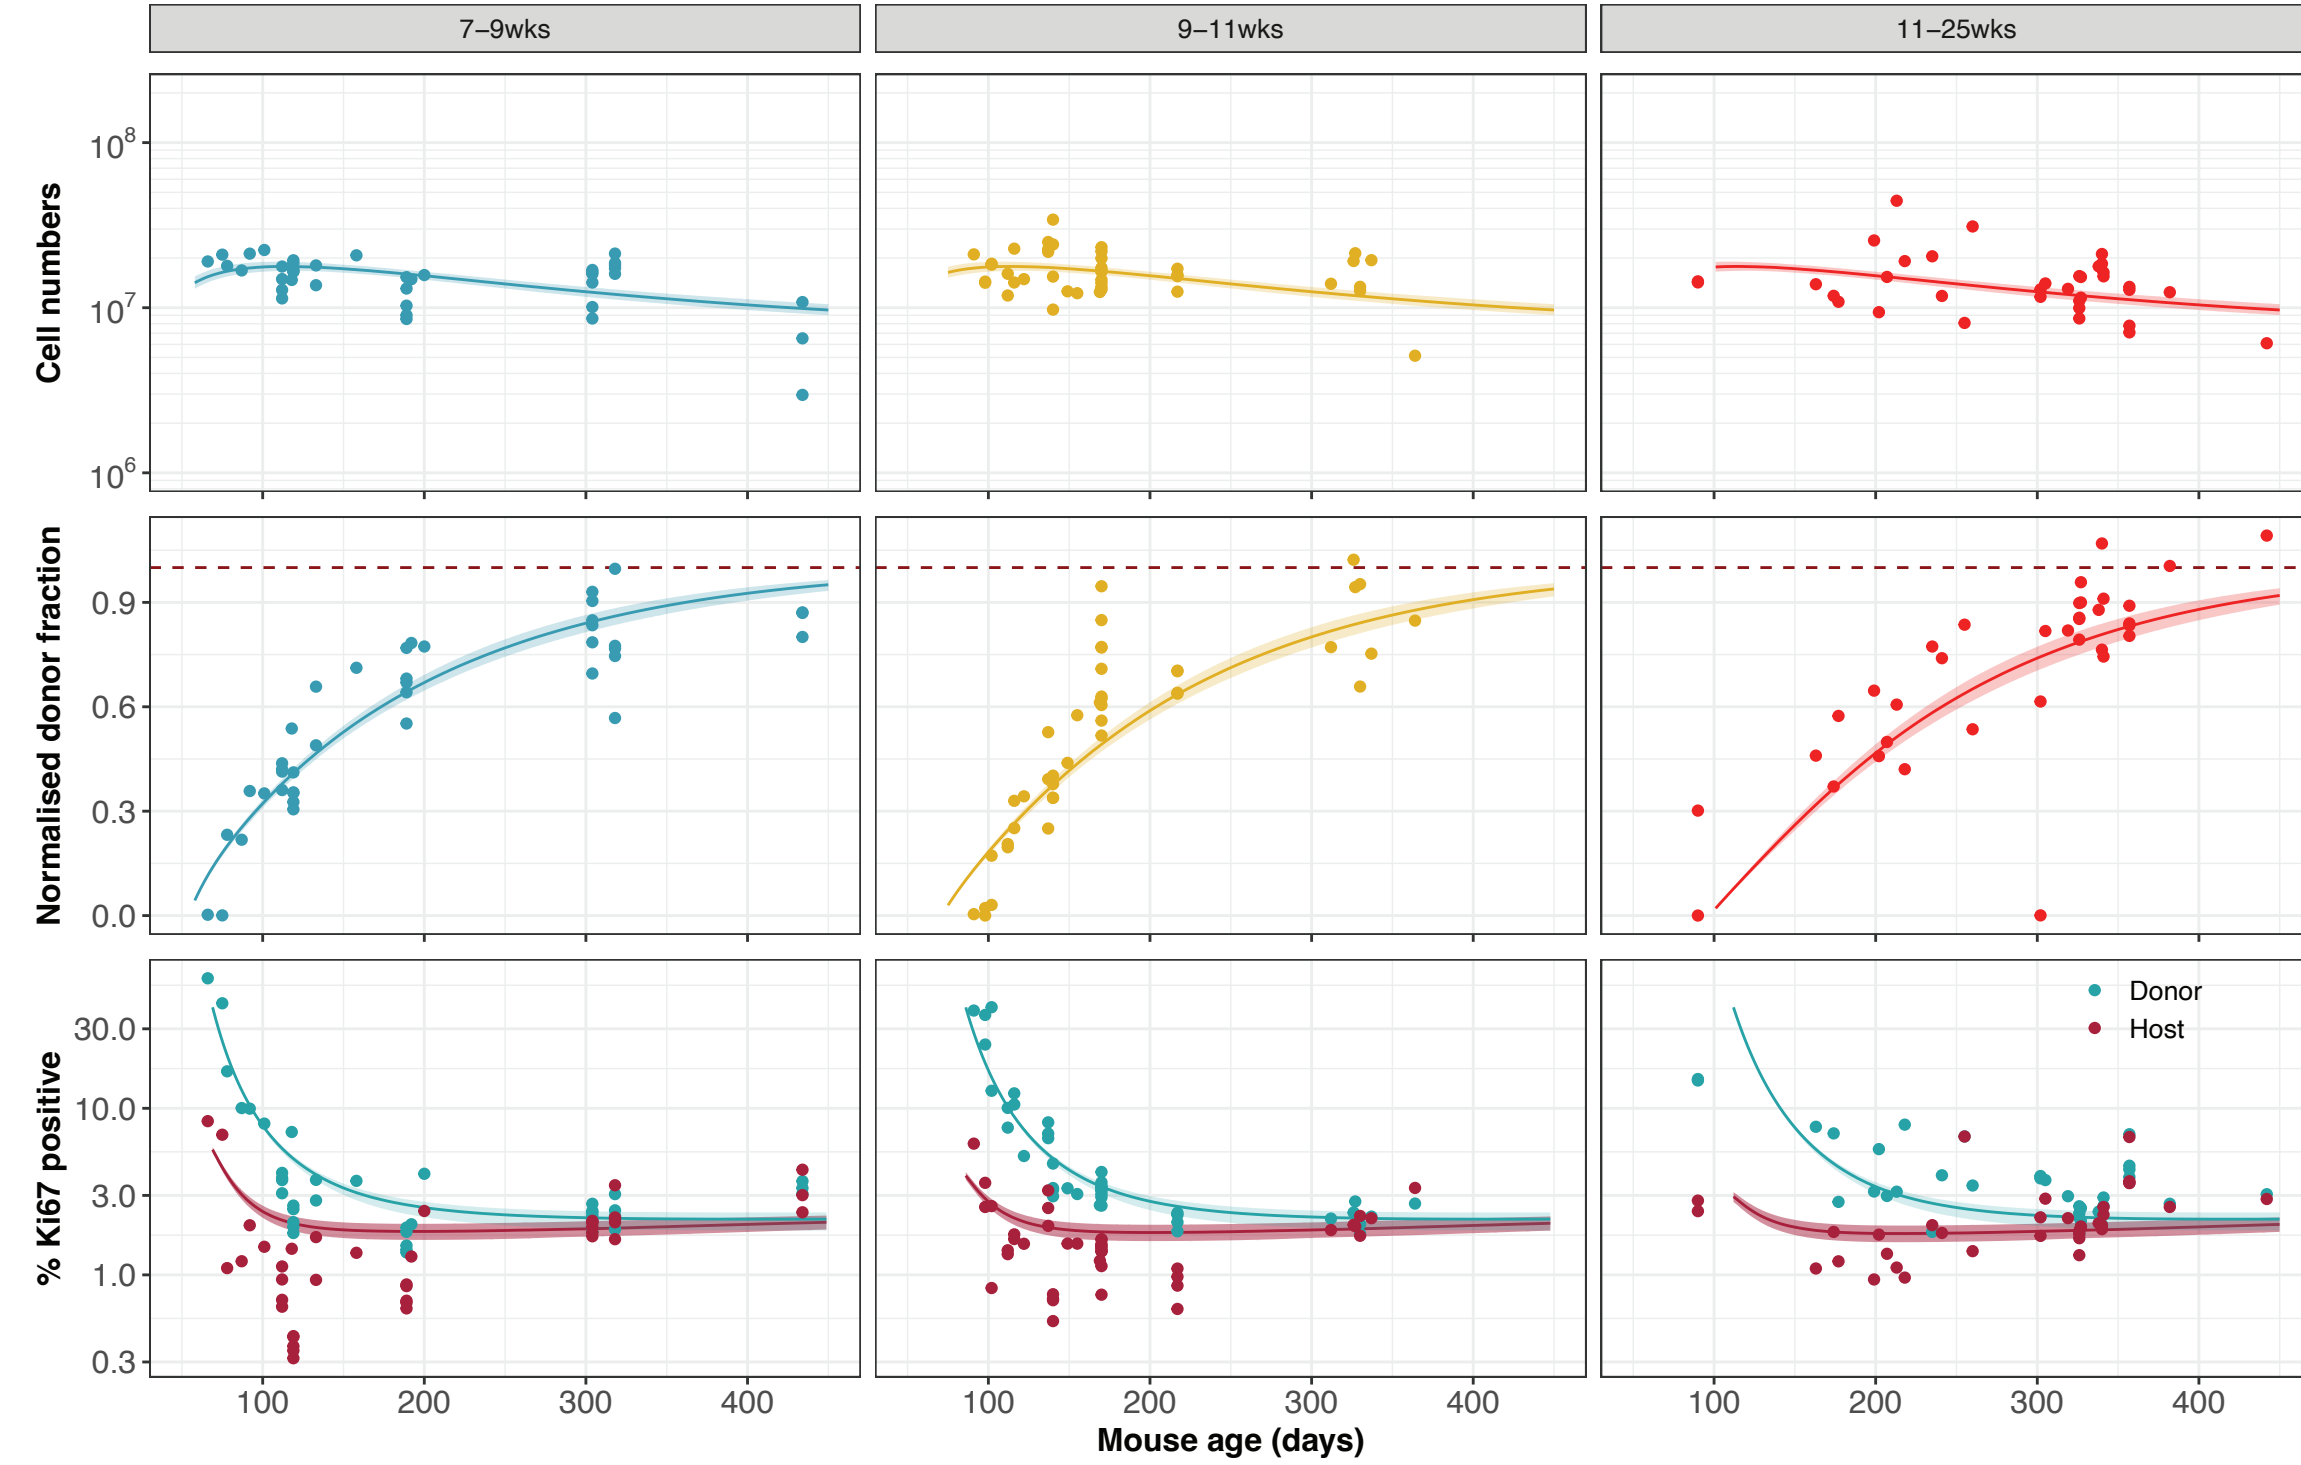

Supplement: supp [file elife_poa_e78168_Figure_2_figure_supplement_1.pdf › elife_poa_e78168_Figure_2_figure_supplement_1.pdf]
