# Supplementary figures and images for: Towards a unified model of naive T cell dynamics across the lifespan
Source: eLife journal article supplement (doi:10.7554/elife.78168), 2022-06-09

## Thymus

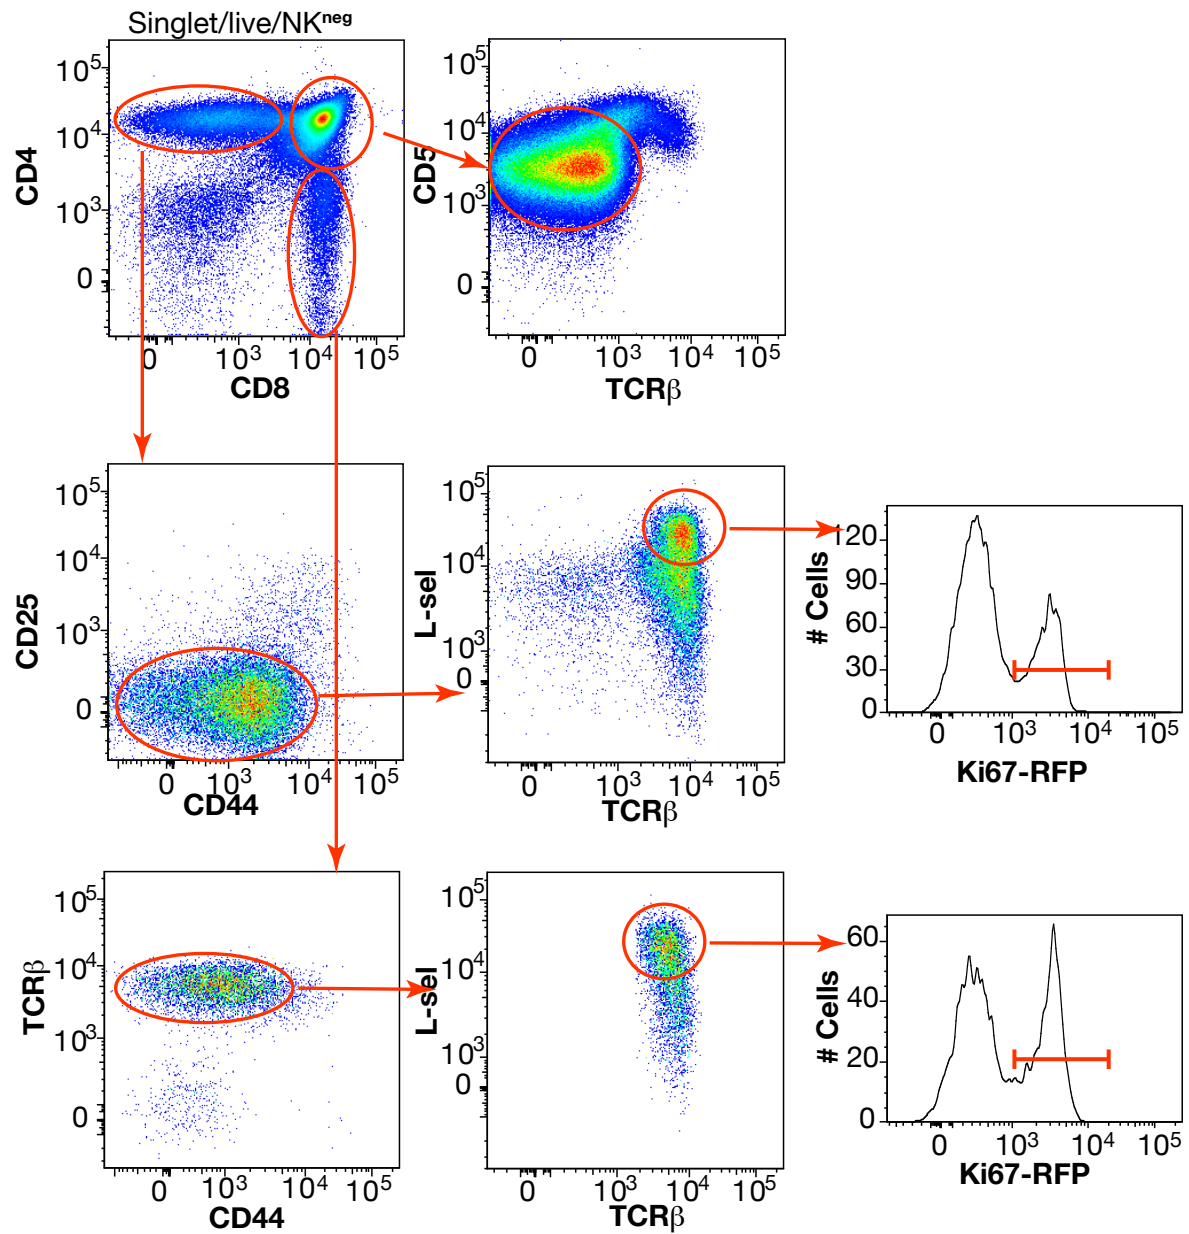

## Periphery

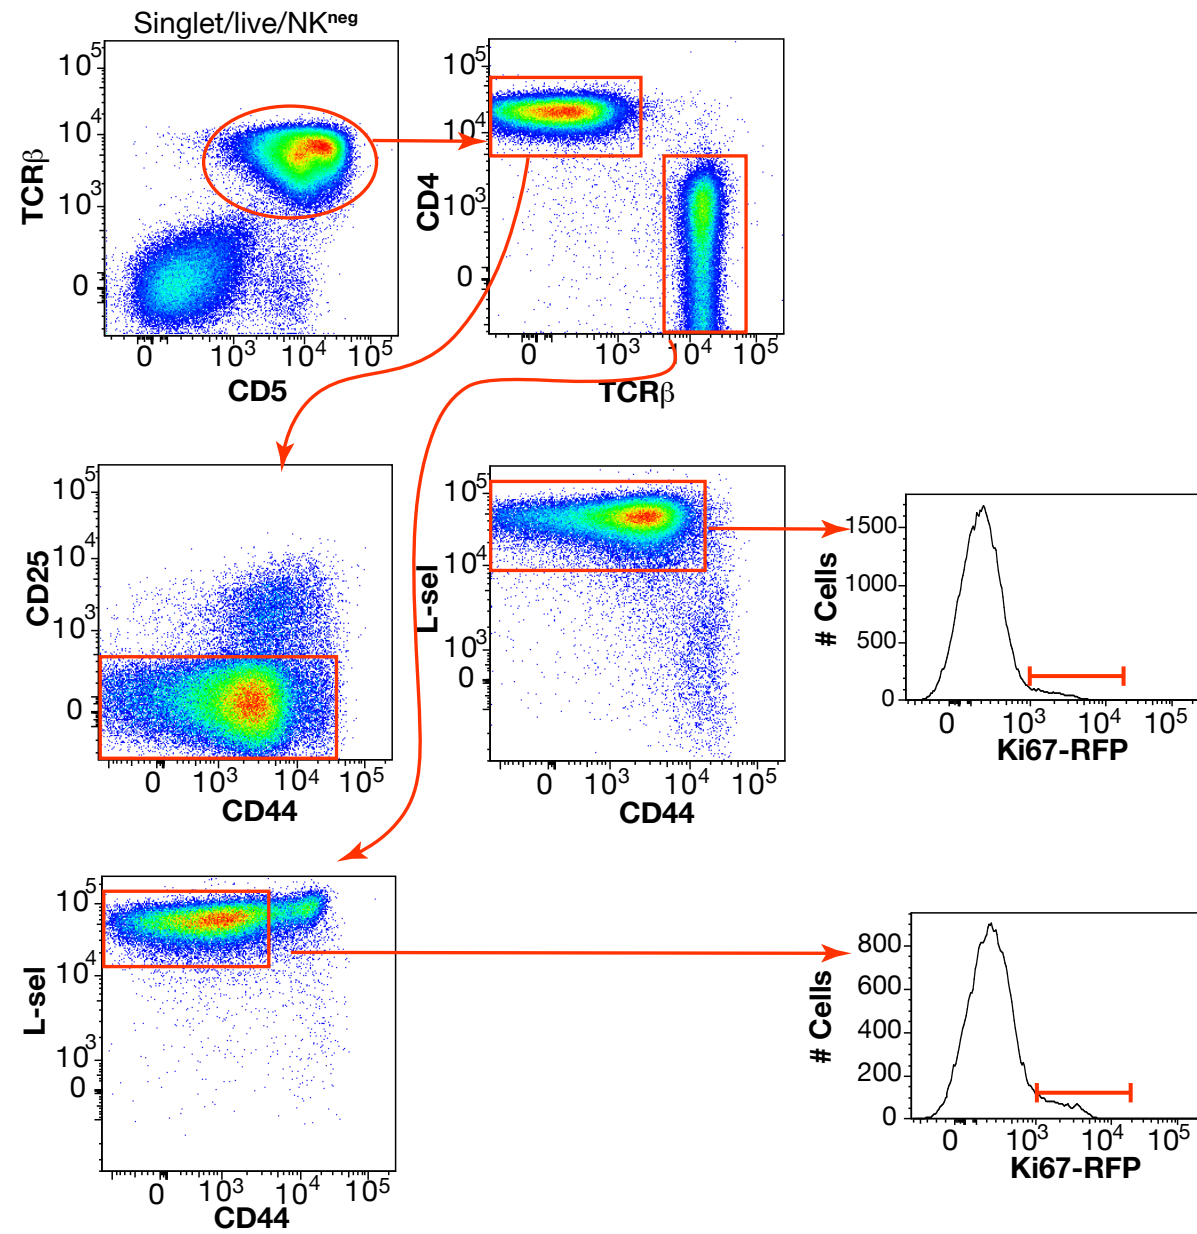

Supplement: supp [file elife_poa_e78168_Figure_1_figure_supplement_1.pdf › elife_poa_e78168_Figure_1_figure_supplement_1.pdf]

**A**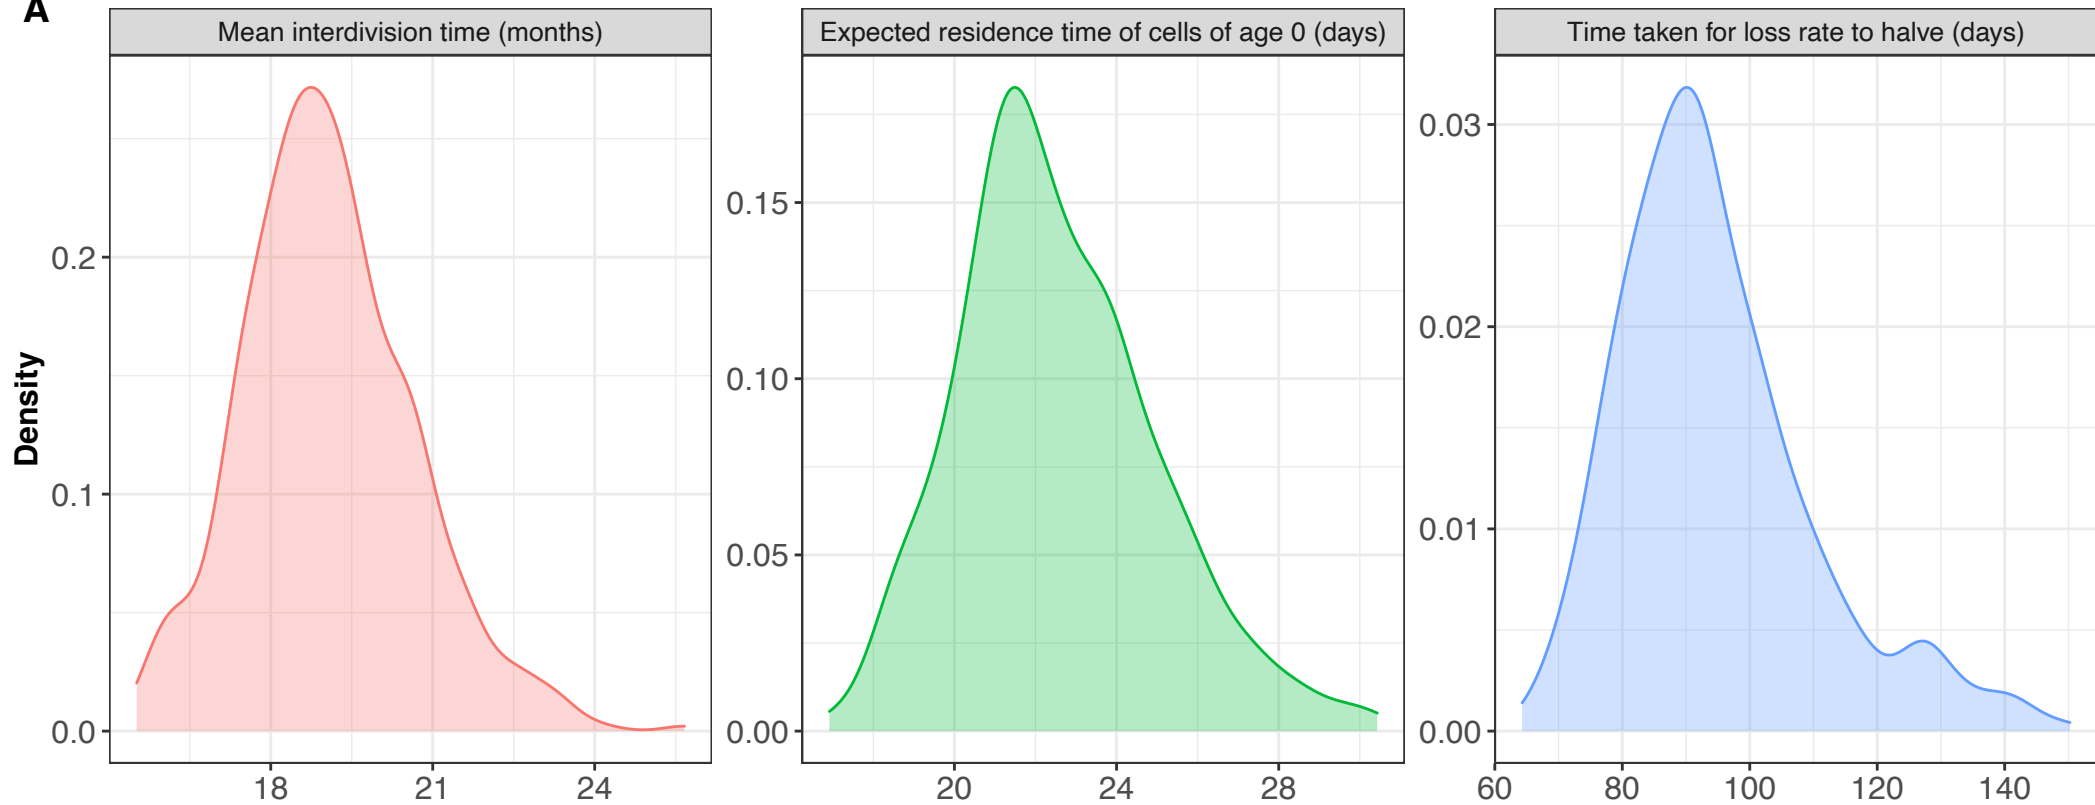**B**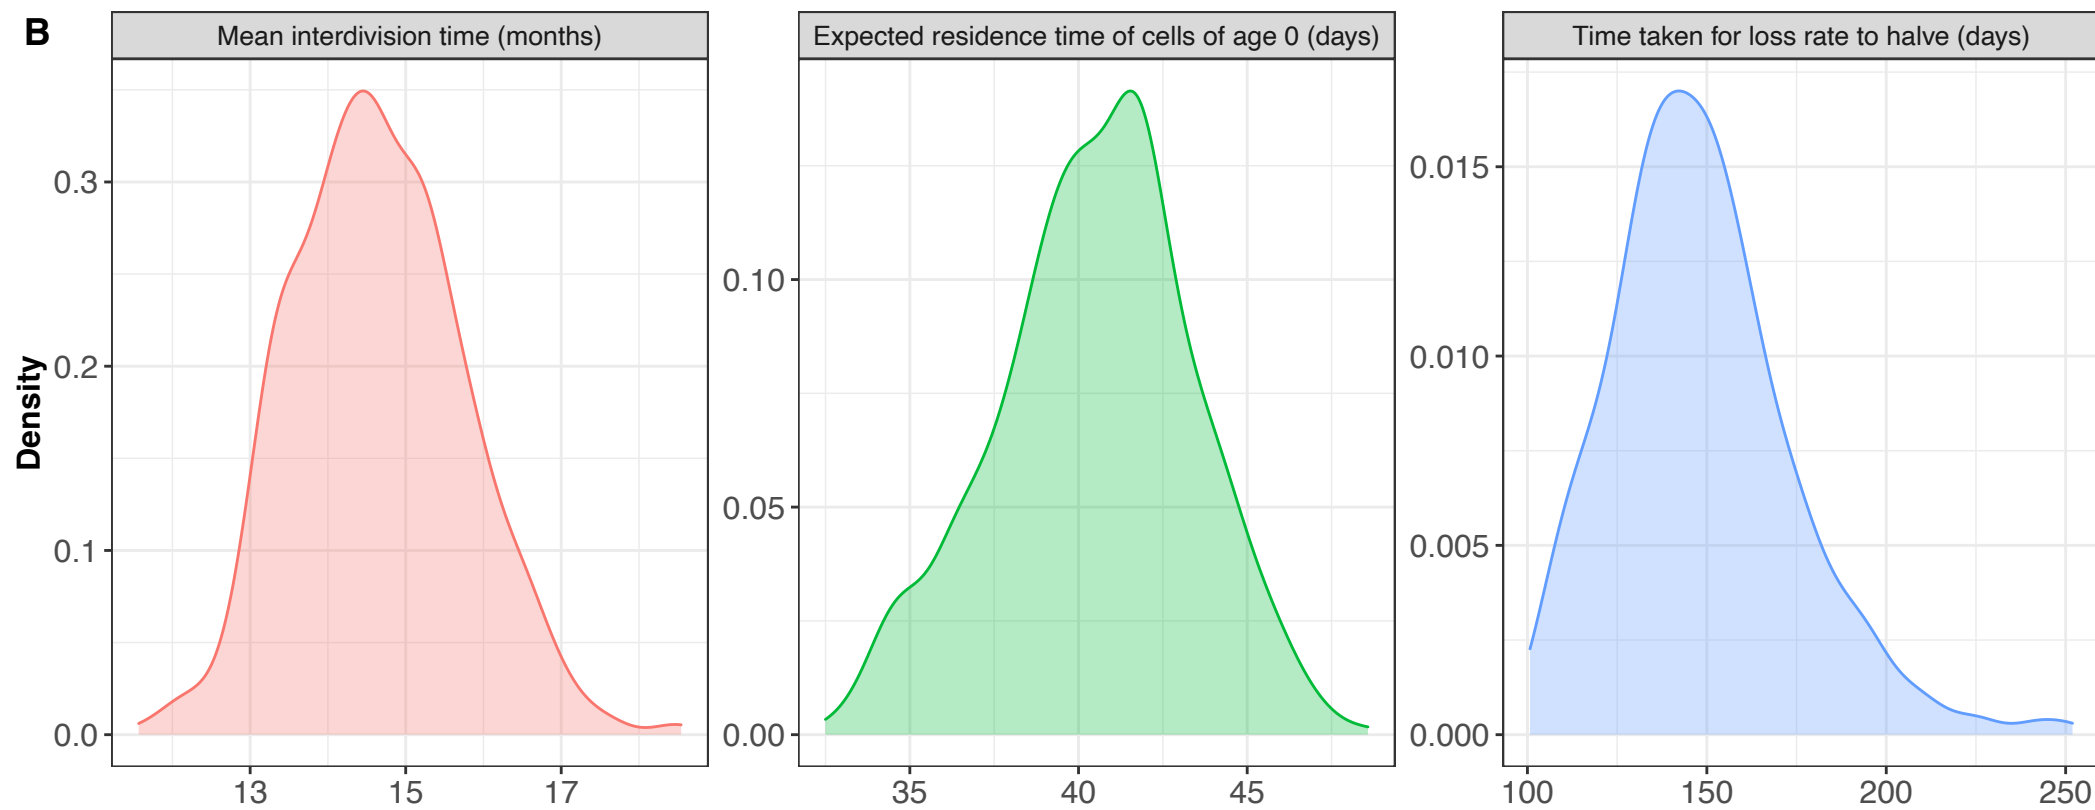

Supplement: supp [file elife_poa_e78168_Figure_2_figure_supplement_2.pdf › elife_poa_e78168_Figure_2_figure_supplement_2.pdf]
